# Supplementary material for: A simple and reliable QSPR model for prediction of chromatography retention indices of volatile organic compounds in peppers
Source: Royal Society of Chemistry journal article supplement (doi:10.1039/d3ra07960k), 2024-01-01
Supplement: d3ra07960k1.xlsx [file d3ra07960k1.xlsx]

## Sheet: Table S1
Table S1. The IDs of the compound, SMILES codes, and corresponding experimental and predicted RI
													Split 1	Split 2	Split 3	Split 4	Split 5	Split 6	Split 7	Split 8	Split 9	Split 10	Calculated RI
ID	SMILES	Expr	Split 1	Split 2	Split 3	Split 4	Split 5	Split 6	Split 7	Split 8	Split 9	Split 10	DCW(1, 15)	DCW(1,40)	DCW(1,15)	DCW(1,15)	DCW(1,15)	DCW(1,15)	DCW(1,15)	DCW(1,20)	DCW(1,15)	DCW(1,15)	Split 1	Split 2	Split 3	Split 4	Split 5	Split 6	Split 7	Split 8	Split 9	Split 10
1	C#CCCCCC(CC)C	996	*	*	-	*	*	#	#	*	-	#	36.8965	30.3471	34.4844	41.3132	30.2021	28.7773	33.8958	29.6643	30.3006	39.4028	904.721	923.006	1006.03	822.304	807.442	955.048	895.565	811.938	1000.53	972.049
2	C1CCC2=C(C1)CC=CC2	1147	#	#	*	-	#	*	*	-	#	-	41.4142	38.2272	47.7962	58.0531	42.8914	38.4953	45.8005	40.2138	39.653	44.0084	1124.63	1131.11	1272.76	1101.26	1095.93	1187.81	1172.21	1086.19	1239.82	1072.74
3	C=C1C(=O)CC2CC1C2(C)C	1181	*	-	-	#	-	#	-	*	-	+	61.073	40.0866	41.577	61.1854	47.9772	38.6748	45.4198	42.6026	37.9867	47.2116	1187.77	1180.22	1148.14	1153.46	1211.56	1192.11	1163.36	1148.29	1197.19	1142.78
4	C=C1C(O)CC2CC1C2(C)C	1160	*	#	-	*	#	+	*	-	*	*	56.6255	38.7996	42.1288	60.4765	45.7615	37.9143	44.0314	40.0398	36.3354	45.9445	1118.33	1146.23	1159.2	1141.65	1161.19	1173.9	1131.1	1081.66	1154.94	1115.07
5	C=C1C2CCC(C1(C)C)C2	956	+	*	*	+	*	-	#	*	#	*	47.0106	35.4414	38.1948	56.1982	39.9425	33.1992	40.1827	36.9326	31.6545	41.59	981.177	1057.54	1080.37	1070.35	1028.89	1060.96	1041.66	1000.89	1035.17	1019.87
6	C=C1CC2C(C1CC2)(C)C	949	-	*	#	*	+	-	+	+	-	*	49.6335	34.3316	37.5517	55.6314	39.819	33.3359	39.8252	36.6784	31.6711	42.0994	1041.92	1028.24	1067.49	1060.91	1026.08	1064.24	1033.35	994.278	1035.6	1031.01
7	C=C1CCC(CC1)C(=C)C	1012	+	+	*	+	*	*	+	#	+	-	42.4581	35.7323	38.9231	59.3997	42.2475	35.3237	42.4503	37.451	32.8772	46.0141	1092.28	1065.23	1094.96	1123.7	1081.29	1111.85	1094.36	1014.36	1066.46	1116.59
8	C=C1CCC2(C1C2)C(C)C	983	*	-	-	*	*	*	*	*	+	#	50.8923	33.8946	36.6236	55.9955	40.2995	32.5977	39.3457	34.6327	32.9627	40.3919	1030.55	1016.69	1048.89	1066.98	1037.01	1046.55	1022.21	941.099	1068.64	993.673
9	C=C1CCC23CC1C(C)(C)C2CCC3C	1447	#	*	-	-	#	#	*	+	-	-	56.8318	49.3532	54.0333	75.1251	57.313	49.3014	59.7016	52.625	44.1116	61.7333	1474.08	1424.95	1397.73	1385.76	1423.81	1446.64	1495.25	1408.83	1353.9	1460.27
10	C=C1CCC2C(=C(CCC2C)C(C)C)C1	1510	+	*	*	+	*	#	+	*	+	+	59.9984	52.3258	60.6544	84.889	59.6214	53.0251	63.2649	56.3892	53.2517	65.6525	1575.74	1503.45	1530.4	1548.47	1476.29	1535.83	1578.05	1506.69	1587.76	1545.96
11	C=C1CCC2C(=C1)C(CCC2C)C(C)C	1494	#	#	*	*	+	*	#	#	*	*	39.2336	50.3192	56.5973	80.2156	57.3074	49.9849	59.753	54.7752	47.8853	62.1265	1471.99	1450.45	1449.11	1470.59	1423.68	1463.01	1496.44	1464.73	1450.45	1468.87
12	C=C1CCC2C(C3C1CCC3(C)O)C2(C)C	1606	*	+	+	#	*	-	#	-	*	+	56.6248	52.5449	63.1671	84.7864	63.1117	56.297	63.9528	60.6224	51.4103	66.7918	1602.86	1509.23	1580.75	1546.76	1555.64	1614.2	1594.04	1616.74	1540.65	1570.87
13	C=C1CCC2CC1C2(C)C	985	#	*	-	*	#	*	#	+	+	*	45.429	33.8895	35.763	55.0497	39.2356	32.523	40.1571	35.7864	31.1222	41.8011	1010.99	1016.56	1031.65	1051.21	1012.82	1044.76	1041.07	971.092	1021.55	1024.48
14	C=C1CCC2OC2(CCC2C1CC2(C)C)C	1605	-	-	-	*	#	*	*	-	+	+	55.8172	53.5825	60.0724	82.8794	60.6833	52.5783	59.2373	58.3495	51.89	67.7658	1480.23	1536.64	1518.74	1514.98	1500.43	1525.13	1484.46	1557.65	1552.92	1592.16
15	C=C1CCCC2(C1CC(CC2)C(=C)C)C	1507	+	-	#	*	+	+	#	+	-	-	43.2515	50.63	60.0842	79.0425	59.8444	50.0388	59.283	53.8012	48.7952	63.8216	1466.36	1458.66	1518.98	1451.04	1481.36	1464.3	1485.52	1439.41	1473.73	1505.93
16	C=C1CCCC2(C1CC(CC2)C(O)(C)C)C	1688	#	+	+	#	-	#	-	*	#	#	35.8306	56.0342	64.7902	86.1031	65.2397	55.777	65.232	59.0774	52.9023	66.9525	1574.27	1601.38	1613.27	1568.7	1604.02	1601.74	1623.76	1576.57	1578.82	1574.38
17	C=CC(=C)CCC(=O)C(=C)C	1152	+	-	+	*	#	-	*	+	*	+	59.376	41.5573	42.293	61.6242	48.3872	37.4298	43.658	40.4366	36.1257	46.7693	1229.91	1219.06	1162.49	1160.77	1220.88	1162.29	1122.42	1091.98	1149.57	1133.11
18	C=CC(=C)CCC1OC1(C)C	1099	-	+	#	+	*	-	#	+	#	-	56.7071	40.4689	38.9481	63.293	44.5059	36.2504	42.5715	40.0732	33.179	45.8729	1080.8	1190.32	1095.47	1188.58	1132.64	1134.04	1097.17	1082.53	1074.18	1113.51
19	C=CC(=C)CCC=C(C)C	988	#	*	+	*	*	-	-	*	*	#	58.0654	36.1051	38.7399	56.3734	40.5209	33.666	38.2613	35.4171	30.8636	41.7844	1073.12	1075.07	1091.3	1073.27	1042.04	1072.14	997.012	961.49	1014.94	1024.12
20	C=CC(=C)CCC=C(CCC=C(C)C)C	1463	*	+	*	+	-	#	-	+	+	#	51.2584	52.6396	57.7132	82.3571	58.0112	50.6945	56.043	51.8505	46.9797	59.9787	1470.52	1511.74	1471.47	1506.28	1439.68	1480.01	1410.23	1388.7	1427.28	1421.91
21	C=CC(=CCC1OC1(C)C)C	1141.5	#	*	+	+	-	*	-	*	*	*	61.0242	39.8625	41.5901	64.7011	45.8402	37.154	45.5194	41.7752	33.8338	47.8644	1089.43	1174.3	1148.41	1212.05	1162.97	1155.69	1165.68	1126.78	1090.93	1157.05
22	C=CC(=CCC=C(C)C)C	1044.5	-	*	#	*	*	*	#	-	+	+	40.0755	37.1339	39.6792	55.0871	42.0146	32.7204	40.1865	37.7485	33.2254	43.5603	1111.45	1102.24	1110.12	1051.84	1076	1049.49	1041.75	1022.1	1075.37	1062.95
23	C=CC(C(=C)C)C=C(COC(=O)C)C	1321	-	*	-	+	*	+	+	+	-	*	54.0917	47.7929	49.4578	71.6869	53.3451	43.6699	50.4628	46.3271	41.3141	54.4186	1254.05	1383.74	1306.05	1328.46	1333.6	1311.76	1280.55	1245.11	1282.32	1300.35
24	C=CC(CC=CC(=C)C)(O)C	1115	-	#	*	*	+	#	+	#	*	-	51.7456	39.6754	39.5959	63.5523	47.4537	36.8172	42.9051	40.8937	37.2329	48.8707	1205.28	1169.36	1108.45	1192.91	1199.66	1147.62	1104.92	1103.86	1177.9	1179.05
25	C=CC(CC=CC(O)(C)C)(O)C	1229	+	#	*	+	+	+	+	-	#	#	39.5774	43.3258	44.5192	67.2355	47.5779	37.7278	45.1691	42.4773	39.1947	48.0988	1294.41	1265.77	1207.1	1254.28	1202.48	1169.43	1157.54	1145.03	1228.09	1162.17
26	C=CC(CCC=C(C)C)(O)C	1105	+	+	+	#	#	*	#	+	*	+	57.0268	40.8341	42.0228	61.9346	44.8561	37.9703	42.8358	42.3643	36.2725	46.8005	1117.95	1199.96	1157.07	1165.95	1140.6	1175.24	1103.32	1142.09	1153.33	1133.79
27	C=CC(CCC=C(CCC=C(C)C)C)(O)C	1575	-	+	+	+	*	*	#	-	*	-	57.5619	56.9274	61.4633	89.1274	63.0833	56.215	61.0291	58.6205	53.1479	66.632	1573.4	1624.97	1546.61	1619.1	1554.99	1612.24	1526.09	1564.69	1585.1	1567.38
28	C=CC(OC(=O)C)(CCC=C(C)C)C	1256	+	-	*	#	+	-	+	+	+	*	38.8635	45.9681	52.8906	70.3877	53.7369	44.1894	52.722	51.3383	42.301	57.1696	1325.37	1335.55	1374.84	1306.81	1342.5	1324.2	1333.05	1375.38	1307.57	1360.49
29	C=CC1(C)CCC(=C(C)C)CC1C(=C)C	1476	+	*	*	#	-	+	*	*	*	#	58.7594	52.7244	56.4792	81.5352	58.5815	49.5748	56.3697	53.171	45.7027	64.2169	1471.43	1513.97	1446.74	1492.58	1452.65	1453.19	1417.82	1423.03	1394.61	1514.57
30	C=CC1(C)CCC(=CC1C(=C)C)C(C)C	1344	+	*	*	+	+	#	+	-	-	-	39.0873	52.9752	55.1159	81.0449	59.7734	48.425	55.705	54.5724	47.1367	64.3166	1549.31	1520.6	1419.43	1484.41	1479.74	1425.65	1402.37	1459.46	1431.3	1516.75
31	C=CC1(C)CCC(C(=O)C1C(=C)C)C(C)C	1522	*	*	*	#	+	*	*	*	*	+	39.1378	55.1796	60.0295	87.3593	64.2877	51.03	60.3862	58.635	51.5568	66.6641	1647.01	1578.81	1517.88	1589.64	1582.38	1488.05	1511.15	1565.07	1544.39	1568.08
32	C=CC1(C)CCC(CC1C(=C)C)C(=C)C	1397	*	#	#	+	+	*	#	*	*	*	42.81	51.0941	57.9424	80.8346	58.2356	47.5068	56.3587	52.8533	44.381	64.2646	1496.56	1470.92	1476.06	1480.9	1444.78	1403.66	1417.56	1414.77	1360.79	1515.61
33	C=CC1(C)CCC(CC1C(=C)C)C(O)(C)C	1570	*	*	+	*	-	+	+	#	#	*	44.7156	56.6661	63.1752	87.5992	63.4941	53.8366	61.8766	58.8989	48.7162	67.0287	1580.81	1618.07	1580.91	1593.63	1564.33	1555.27	1545.79	1571.93	1471.71	1576.05
34	C=CC1(C)CCC(O1)C(=C)C	1019	+	#	-	+	-	#	+	+	*	*	37.5232	38.7074	37.58	60.8515	46.2597	36.6365	41.5812	39.3107	33.9909	45.4826	1038.65	1143.8	1068.05	1147.9	1172.51	1143.29	1074.16	1062.71	1094.95	1104.97
35	C=CC1(C)CCC(O1)C(O)(C)C	1066.75	-	-	#	+	-	*	-	-	#	-	56.354	43.2242	41.4	64.184	47.3627	36.9793	45.2475	40.8136	35.5735	48.9669	1147.43	1263.08	1144.6	1203.43	1197.59	1151.5	1159.36	1101.78	1135.44	1181.15
36	C=CCc1ccc(c(c1)OC)O	1390	#	*	*	-	+	*	*	*	*	#	38.3727	47.0714	51.3389	74.231	57.1914	43.4714	56.3807	51.1802	45.885	57.1422	1407.33	1364.68	1343.75	1370.86	1421.04	1307	1418.07	1371.27	1399.28	1359.9
37	C=CCc1ccc(c(c1)OC)OC	1428	+	*	*	*	+	#	*	+	#	*	55.2394	51.4828	55.6502	82.5291	59.1317	48.234	63.2919	54.1824	47.1498	63.3337	1466.34	1481.18	1430.13	1509.14	1465.15	1421.07	1578.68	1449.32	1431.63	1495.26
38	C=CCc1ccc2c(c1)OCO2	1314	#	-	-	+	*	+	+	+	-	#	39.1236	47.2024	49.5264	72.9763	55.1608	44.3812	52.9605	45.9576	42.9619	57.0492	1340.21	1368.14	1307.43	1349.95	1374.88	1328.79	1338.59	1235.5	1324.48	1357.86
39	C=Cc1cccc(c1C)C	1103	*	*	*	+	*	#	+	#	+	-	46.5568	36.9623	38.115	58.6127	44.8213	36.4416	42.4165	39.7175	34.4236	47.1199	1142.94	1097.71	1078.77	1110.59	1139.81	1138.62	1093.57	1073.28	1106.02	1140.77
40	CC(=C)C1C=CC(C1)(C)C	1028	#	+	*	*	*	#	*	+	-	#	59.4189	36.3715	38.5425	59.5817	41.0631	33.8504	39.5367	40.1717	33.1798	45.1253	1096.67	1082.11	1087.34	1126.74	1054.37	1076.56	1026.65	1085.09	1074.2	1097.16
41	CC(=C)C1CC=C(C(=O)C1)C	1265	*	+	*	#	-	#	*	-	-	#	62.9801	42.3996	44.9764	65.0494	52.0448	42.5912	47.4284	44.6197	39.6104	50.6788	1269.49	1241.31	1216.26	1217.85	1304.04	1285.92	1210.04	1200.72	1238.73	1218.58
42	CC(=C)C1CC=C(C(C1)O)C	1253.5	+	#	*	-	+	*	*	-	*	*	54.7606	44.1325	46.3339	66.9446	48.3283	41.4535	45.1471	44.1575	38.0392	47.8016	1191.01	1287.07	1243.46	1249.44	1219.54	1258.67	1157.03	1188.71	1198.53	1155.68
43	CC(=C)C1CCC(C(=O)C1)C	1221	-	*	-	*	#	*	#	-	*	+	59.0412	39.3411	44.1691	62.1777	47.3197	38.5309	46.2844	44.3073	36.838	49.2184	1160.13	1160.53	1200.08	1170	1196.61	1188.66	1183.45	1192.6	1167.8	1186.65
44	CC(=C)C1CCC(C2=C(C1)C(C)CC2)C	1446	+	*	*	+	#	*	#	-	*	+	56.1405	52.99	59.2542	79.1369	61.1091	51.9577	57.2134	55.5233	50.4475	63.2395	1446.48	1520.99	1502.35	1452.61	1510.11	1510.27	1437.42	1484.18	1516.01	1493.2
45	CC(=C)C1CCC(C2C(=C(C)CC2)C1)C	1367	*	-	-	-	*	-	+	+	+	#	40.4583	51.8682	58.6829	80.1788	60.1328	52.3107	58.6858	54.1486	49.8881	65.0218	1466.77	1491.36	1490.9	1469.98	1487.91	1518.72	1471.64	1448.44	1501.7	1532.17
46	CC(=C)C1CCC(C=C1)(C)O	1138	-	+	*	-	#	#	+	+	*	+	38.1182	40.804	42.8233	65.1411	48.1748	41.1418	45.5332	45.2038	41.392	49.8663	1254.37	1199.17	1173.12	1219.38	1216.05	1251.2	1166	1215.91	1284.32	1200.82
47	CC(=C)C1CCC2(C(C1)O2)C	1147	+	-	-	*	*	*	-	-	+	*	47.6599	42.1872	45.6535	63.5889	48.1048	36.6207	47.0462	44.0508	36.7445	51.4238	1137.46	1235.7	1229.83	1193.52	1214.46	1142.91	1201.16	1185.94	1165.4	1234.87
48	CC(=C)C1CCC2=CCCC(C2(C1)C)C	1507	*	*	-	*	-	+	*	+	*	*	50.8662	52.3078	58.9558	79.9497	61.2081	49.9269	59.1711	54.6463	49.6183	65.675	1480.77	1502.97	1496.37	1466.16	1512.36	1461.62	1482.92	1461.38	1494.8	1546.45
50	CC(=C1CC=C2C(C1)(C)C(C)CC=C2)C	1540	*	+	+	#	*	+	#	*	#	*	49.1694	53.0906	63.1606	85.0767	61.6584	52.5354	62.4227	57.3724	51.6128	68.2514	1617.38	1523.65	1580.62	1551.6	1522.6	1524.1	1558.48	1532.25	1545.83	1602.78
51	CC(=C1CCC(C2=C(C1)C(C)CC2)C)C	1505.5	-	*	-	-	-	*	-	#	*	+	47.8739	52.91	59.6207	79.4118	59.5716	51.6723	59.6418	55.9035	52.3258	66.0558	1496.16	1518.88	1509.69	1457.19	1475.16	1503.43	1493.86	1494.06	1564.07	1554.78
52	CC(=CC1CC2CC1CC2)C	1111	*	#	+	*	+	#	-	#	+	+	56.8157	39.7302	45.4289	54.4407	46.4881	35.5354	44.5497	45.0949	36.1334	47.7149	1132.87	1170.81	1225.33	1041.07	1177.7	1116.92	1143.14	1213.08	1149.77	1153.78
53	CC(=CC=CC(=O)C)C	1118	-	#	+	+	*	+	*	+	*	#	53.2353	35.5651	34.0282	47.2219	39.8128	31.1284	38.5592	38.9609	31.4382	42.6783	1042.03	1060.81	996.886	920.769	1025.94	1011.36	1003.93	1053.62	1029.64	1043.66
54	CC(=CCC(C(=C)C)C)C	1063	+	-	+	#	+	+	-	+	*	+	48.1705	36.5986	37.6691	53.861	40.3946	32.3354	37.7277	39.1082	29.9352	42.0484	954.962	1088.11	1069.84	1031.4	1039.17	1040.27	984.611	1057.44	991.183	1029.89
55	CC(=CCC=C(C1CCC(=CC1)C)C)C	1511	#	*	-	*	#	*	-	-	*	*	52.6683	54.23	61.8765	82.4918	62.5674	51.551	62.6818	57.0411	51.5455	67.3275	1576.83	1553.74	1554.89	1508.52	1543.26	1500.52	1564.5	1523.64	1544.1	1582.58
56	CC(=CCCC(=C)C1CCC(=CC1)C)C	1520	+	*	#	*	*	+	#	*	+	-	49.5435	52.5875	59.5863	83.9517	62.3586	52.4687	59.6485	55.5836	48.4383	66.8462	1534	1510.36	1509	1532.85	1538.52	1522.5	1494.01	1485.75	1464.6	1572.06
57	CC(=CCCC(=C1CCC(=CC1)C)C)C	1523	*	-	#	#	*	+	+	+	-	#	45.7145	52.5414	60.3202	83.3593	59.8457	52.6187	60.0092	56.4116	48.4263	67.38	1523.73	1509.14	1523.71	1522.98	1481.39	1526.1	1502.39	1507.27	1464.3	1583.73
58	CC(=CCCC(C12CC=C(C2C1)C)C)C	1408	-	*	*	*	*	+	#	#	+	-	60.974	51.8856	56.9681	77.6992	58.0709	50.2423	58.0526	54.2611	48.4802	63.7663	1379.5	1491.82	1456.54	1428.66	1441.04	1469.18	1456.93	1451.37	1465.67	1504.72
59	CC(=CCCC(C1=CC=C(CC1)C)C)C	1493	+	#	*	+	#	*	#	#	*	*	44.042	53.0846	57.2804	82.815	60.9602	52.5478	59.6985	57.3956	49.2549	66.5059	1468.37	1523.49	1462.8	1513.91	1506.73	1524.4	1495.17	1532.85	1485.5	1564.62
60	CC(=CCCC(C1=CCC(=CC1)C)C)C	1523	*	*	+	-	*	*	#	-	#	+	47.1207	53.7419	63.5358	82.5301	60.8047	50.1634	62.3923	56.4248	51.824	68.4551	1582.8	1540.85	1588.14	1509.16	1503.19	1467.29	1557.77	1507.61	1551.23	1607.23
61	CC(=CCCC(C1CC=C(C=C1)C)C)C	1505	+	-	+	+	-	#	*	+	*	*	40.3937	52.1777	59.4957	83.2671	62.0096	51.3487	59.9256	56.8687	50.3248	64.7768	1501.77	1499.54	1507.19	1521.44	1530.58	1495.68	1500.45	1519.15	1512.87	1526.81
62	CC(=CCCC(c1ccc(cc1)C)C)C	1495	#	+	*	*	+	+	#	+	*	#	46.6317	54.2496	64.2861	84.5278	62.4945	51.2538	61.1816	58.7291	49.7886	67.5871	1476.86	1554.25	1603.17	1542.45	1541.61	1493.41	1529.64	1567.52	1499.15	1588.26
63	CC(=CCCC1(C)C2CC3C1(C)C3C2)C	1431	#	-	*	*	+	*	*	*	*	-	39.8829	49.5345	52.7894	76.0319	60.027	45.6144	55.6541	52.7672	45.0059	60.2154	1387.29	1429.73	1372.81	1400.87	1485.51	1358.33	1401.19	1412.53	1376.78	1427.09
64	CC(=CCCC1(C)C2CC=C(C1C2)C)C	1433.5	*	*	+	+	#	-	-	*	*	#	62.4451	52.4715	58.0892	80.2568	60.8582	50.7182	59.6663	54.6561	48.6653	63.614	1418.12	1507.3	1479	1471.28	1504.41	1480.58	1494.43	1461.63	1470.41	1501.39
65	CC(=CCCC1(C)C2CCC(C1=C)C2)C	1432	*	#	+	+	#	-	-	-	-	#	40.6597	52.3529	59.116	79.9982	61.4601	50.3036	58.0054	56.5544	48.6832	65.1214	1446.62	1504.16	1499.58	1466.97	1518.09	1470.64	1455.83	1510.98	1470.87	1534.35
66	CC(=CCOC(=O)C)CCC=C(C)C	1382.5	*	#	*	*	#	-	+	*	-	+	44.8628	47.5616	52.4944	72.3207	54.1875	46.0947	51.9428	51.809	42.6184	58.2084	1328.27	1377.63	1366.9	1339.03	1352.75	1369.83	1314.95	1387.62	1315.7	1383.21
67	CC(=O)CCC=C(C)C	995	*	*	+	+	*	*	*	#	#	#	42.081	32.9158	33.2345	50.9154	39.4578	31.8311	36.7704	37.7304	29.9478	39.724	916.473	990.846	980.981	982.319	1017.87	1028.19	962.367	1021.63	991.505	979.071
68	CC(=O)OC(C1CCC(=CC1)C)(C)C	1333	*	#	-	*	#	+	+	+	*	#	47.566	46.3937	54.8625	75.9073	52.8962	45.8028	54.4003	52.0154	42.1457	60.7433	1373.65	1346.79	1414.35	1398.79	1323.39	1362.84	1372.05	1392.99	1303.6	1438.63
69	CC(=O)OC1(C)CCC2(C1C2)C(C)C	1250.5	+	+	-	#	+	*	*	-	#	*	65.1788	45.1765	51.6102	71.9962	51.5261	39.7819	50.5459	46.5528	40.4053	55.0718	1334.37	1314.64	1349.18	1333.62	1292.24	1218.63	1282.48	1250.98	1259.07	1314.63
70	CC(=O)OC1C2CC=C(C1C2(C)C)C	1246	#	-	#	#	*	+	*	-	+	*	61.4472	47.9994	51.2436	71.8586	52.1127	44.0387	50.4875	47.4618	42.0644	56.1915	1316.24	1389.19	1341.84	1331.33	1305.58	1320.59	1281.13	1274.61	1301.52	1339.11
71	CC(=O)OC1CC2C(C1(C)CC2)(C)C	1297	#	*	#	#	#	#	+	*	*	#	45.2557	47.2028	49.5004	70.2866	51.9123	41.2642	51.8353	47.7638	40.2477	55.9354	1362.29	1368.15	1306.91	1305.13	1301.02	1254.13	1312.45	1282.46	1255.04	1333.51
72	CC(=O)OC1CC2CCC1(C)OC2(C)C	1352	-	*	#	-	-	#	*	#	-	*	43.5157	50.0573	54.5464	74.0266	54.2412	44.0906	53.8819	51.0444	41.4934	61.2784	1368.54	1443.54	1408.02	1367.45	1353.97	1321.83	1360.01	1367.74	1286.91	1450.33
73	CC(=O)OCC1=CCC(CC1)C(=C)C	1452	#	*	*	*	*	*	#	-	-	+	39.3664	48.4425	53.2186	74.5414	55.1685	46.6213	52.8283	52.7601	42.8667	59.1687	1421.95	1400.89	1381.41	1376.03	1375.05	1382.45	1335.52	1412.35	1322.05	1404.2
74	CC(=O)OCC1=CCC2CC1C2(C)C	1336	#	+	*	*	#	+	-	+	*	+	57.1896	46.5019	51.7842	71.3213	53.2757	44.2065	51.9767	51.749	42.6643	57.13	1338.7	1349.64	1352.67	1322.37	1332.02	1324.61	1315.73	1386.06	1316.87	1359.63
75	CC(=O)Oc1ccccc1C	1109	*	#	*	-	+	+	*	+	*	*	40.9475	37.0918	36.3043	56.2274	45.5864	32.9056	39.541	44.8092	35.968	48.7302	1184.03	1101.13	1042.49	1070.84	1157.2	1053.93	1026.75	1205.65	1145.54	1175.98
76	CC(=O)c1ccccc1	1088	#	*	*	*	-	-	*	-	*	#	42.1938	39.1904	33.868	54.0966	42.5136	34.0694	42.7558	39.1738	37.0383	45.19	1134.62	1156.55	993.674	1035.33	1087.34	1081.8	1101.46	1059.15	1172.92	1098.58
77	CC(C12CC2C(=C)C(C1)O)C	1158	*	*	-	*	-	*	#	-	*	-	47.9925	42.898	41.9933	63.8965	47.0832	39.5074	45.3518	42.5981	38.0049	46.9891	1142.96	1254.47	1156.49	1198.64	1191.23	1212.06	1161.78	1148.17	1197.65	1137.91
78	CC(C12CCC(C2C1)(C)O)C	1098	-	#	+	-	*	-	+	*	+	-	46.0093	39.3654	42.0875	61.5982	45.3974	40.9007	45.7017	42.27	37.2534	49.8158	1116.51	1161.17	1158.37	1160.34	1152.91	1245.43	1169.91	1139.64	1178.43	1199.71
79	CC(C12CCC3(C(C2O1)O3)C)C	1332	*	#	#	#	+	*	+	-	+	+	60.9781	43.4747	44.5288	66.3863	48.5318	39.0038	49.6006	48.518	38.6113	53.7867	1187.5	1269.7	1207.29	1240.13	1224.17	1199.99	1260.52	1302.07	1213.17	1286.53
80	CC(C1=C2CCCCC2(CC1=O)C)C	1663	-	#	-	-	+	+	-	-	#	-	43.6568	54.2434	56.3513	75.7401	61.6714	54.2646	56.7457	54.9788	49.4473	59.6416	1544.83	1554.09	1444.18	1396.01	1522.89	1565.52	1426.56	1470.02	1490.42	1414.54
81	CC(C1=CC2C(CC1)(C)CCCC2(C)O)C	1624	+	*	+	*	#	-	-	-	#	+	44.1732	57.5811	61.3645	87.2462	66.8805	58.2195	63.3622	62.4666	54.5609	70.2027	1574.53	1642.24	1544.63	1587.75	1641.32	1660.25	1580.31	1664.68	1621.26	1645.44
82	CC(C1C=CC2(C(C1)O2)C)C	1229	-	+	+	+	-	-	#	+	+	*	48.0054	38.4809	44.285	64.0122	45.9393	36.2904	44.7909	41.2752	37.8219	48.5098	1131.58	1137.81	1202.4	1200.57	1165.23	1135	1148.75	1113.78	1192.97	1171.16
83	CC(C1CC=C(c2c1cc(C)cc2)C)C	1560	*	+	#	*	-	-	-	*	*	#	57.8373	56.4556	62.117	81.1877	62.9103	52.3119	60.3283	58.0743	49.038	65.9788	1493.05	1612.51	1559.71	1486.79	1551.06	1518.75	1509.81	1550.49	1479.95	1553.09
84	CC(C1CCC(=C)C=C1)C	1041	+	+	#	*	-	*	+	+	-	*	39.3709	34.0328	37.2126	57.8001	40.9179	33.5504	39.9634	36.5914	32.866	44.8449	1059.36	1020.34	1060.69	1097.05	1051.07	1069.37	1036.57	992.019	1066.17	1091.03
85	CC(C1CCC(=C)C=C1)CCC=C(C)C	1536	*	-	*	*	*	+	+	*	+	-	53.0934	51.3004	58.7865	83.3008	60.4977	50.8918	59.2293	54.8516	49.6723	64.6429	1506.54	1476.37	1492.98	1522	1496.21	1484.73	1484.27	1466.72	1496.17	1523.89
86	CC(C1CCC(=C)CC1)(O)C	1187	-	-	+	*	#	+	-	*	+	+	52.6478	40.5727	44.9247	65.6863	46.9097	41.6461	45.0072	44.3648	37.1773	50.5753	1204.55	1193.06	1215.22	1228.47	1187.29	1263.28	1153.77	1194.1	1176.48	1216.32
87	CC(C1CCC(=C)c2c1cc(C)cc2)C	1585	#	+	#	+	-	*	+	-	#	+	42.3995	55.8217	62.1257	82.0934	62.6883	50.8801	60.7093	56.1585	48.0303	66.377	1520.62	1595.77	1559.88	1501.88	1546.01	1484.45	1518.66	1500.69	1454.16	1561.8
88	CC(C1CCC(=O)C=C1)C	1210	*	+	#	+	*	-	+	#	#	#	59.8163	36.7615	40.0882	57.318	43.2096	36.8603	44.2269	40.3717	36.3689	46.8022	1106.6	1092.41	1118.31	1089.01	1103.17	1148.65	1135.64	1090.29	1155.8	1133.82
89	CC(C1CCC(C23C1C2C(=C)CC3)C)C	1394	*	*	+	+	#	-	*	#	#	*	43.0125	48.8709	53.0256	76.3251	56.0082	48.5963	57.8111	51.6744	45.1593	60.6191	1413.37	1412.21	1377.54	1405.76	1394.14	1429.75	1451.31	1384.12	1380.71	1435.91
90	CC(C1CCC(C23C1C2C(=CC3)C)C)C	1356	*	*	#	#	-	#	+	-	+	#	45.9795	49.8686	53.933	75.2485	55.4499	47.8654	58.0766	53.308	45.4125	60.8286	1407.35	1438.56	1395.72	1387.82	1381.45	1412.25	1457.48	1426.59	1387.18	1440.49
91	CC(C1CCC(C=C1)(C)O)C	1137	*	*	*	+	+	*	+	*	*	+	53.8656	37.8581	42.9696	63.8432	43.0635	40.2403	44.1755	42.875	38.541	48.3435	1173.68	1121.37	1176.05	1197.75	1099.85	1229.61	1134.45	1155.37	1211.37	1167.52
92	CC(C1CCC(c2c1cc(C)cc2)C)C	1532	*	*	+	+	*	+	*	+	#	#	44.8498	56.6243	63.197	79.2772	61.0673	50.7808	56.876	56.2487	48.4026	65.3898	1507.47	1616.97	1581.35	1454.95	1509.16	1482.08	1429.58	1503.04	1463.69	1540.22
93	CC(C1CCC2(C(C1=C)O2)C)C	1330	*	*	+	+	*	*	-	*	-	*	41.454	38.6472	49.7893	64.6609	50.5488	38.9372	48.3245	43.4472	38.9326	53.4817	1183.87	1142.21	1312.7	1211.38	1270.02	1198.4	1230.86	1170.25	1221.39	1279.86
94	CC(C1CCC2(C1C1C(=C)CCC21)C)C	1397	+	#	+	#	+	*	*	+	*	+	38.0244	50.0896	55.4837	78.3164	58.023	48.6464	56.9582	51.9568	47.0737	58.9775	1404.05	1444.39	1426.8	1438.94	1439.95	1430.95	1431.49	1391.46	1429.69	1400.02
95	CC(C1CCC2(C3C1C(CC3)C2=C)C)C	1405	*	-	#	*	*	*	+	*	*	-	34.9431	50.5971	56.8976	74.7548	59.0372	47.6313	56.0003	55.2581	46.97	59.288	1490.69	1457.8	1455.13	1379.59	1463.01	1406.64	1409.23	1477.28	1427.04	1406.81
96	CC(C1CCC2(C3C1C1C(C21C)C3)C)C	1382	-	-	-	*	*	-	+	*	*	+	37.1759	47.3317	55.1948	75.7249	55.5049	49.0658	55.4926	52.4453	46.939	57.7795	1398.49	1371.56	1421.01	1395.75	1382.7	1441	1397.44	1404.16	1426.24	1373.83
97	CC(C1CCC2(C3C1C2C(=C)CC3)C)C	1441	*	+	#	*	*	+	-	+	*	-	47.0955	47.9965	54.7163	77.55	56.6175	47.7733	56.8025	52.6471	45.9022	61.2705	1441.43	1389.12	1411.42	1426.17	1407.99	1410.04	1427.88	1409.41	1399.71	1450.15
98	CC(C1CCC2(C3C1C2C(=CC3)C)C)C	1382	*	+	+	#	+	-	+	*	*	#	60.6905	49.3094	55.4101	77.0231	57.3273	47.6914	57.3968	54.2702	46.3295	61.9573	1449.41	1423.79	1425.32	1417.39	1424.13	1408.08	1441.69	1451.6	1410.65	1465.17
99	CC(CC(=O)OCCC(=C)C)C	1122	-	#	*	*	*	*	#	+	#	*	56.9762	39.4097	45.0829	63.744	44.7629	38.5541	42.1369	44.6752	35.8039	47.5868	1176.77	1162.34	1218.39	1196.1	1138.48	1189.22	1087.07	1202.17	1141.34	1150.98
100	CC(CC1C(=O)CC2CC1C2(C)C)C	1237	+	+	#	+	+	+	+	#	-	-	60.6395	46.6906	50.5833	72.9738	55.2018	44.509	53.0663	52.5683	44.8484	56.6578	1346.35	1354.63	1328.61	1349.91	1375.81	1331.85	1341.05	1407.36	1372.75	1349.3
101	CC(CCC=C(C)C)CCOC(=O)C	1354	*	-	#	*	-	#	+	*	*	+	54.998	46.606	52.5227	72.8369	52.9281	45.4853	53.3406	50.8841	44.9574	57.0611	1303.73	1352.39	1367.47	1347.63	1324.12	1355.24	1347.43	1363.58	1375.54	1358.12
102	CC(CCOC(=O)CC(C)C)C	1108	#	+	-	*	+	*	+	-	*	-	39.4456	37.7161	41.1794	64.1158	43.3535	36.7097	42.8889	40.4659	36.6653	47.9423	1142.43	1117.62	1140.18	1202.3	1106.44	1145.05	1104.55	1092.74	1163.38	1158.75
103	CC(c1ccccc1)(C)C	1146	-	*	+	#	-	+	-	*	-	*	55.536	38.0402	38.5169	61.0428	40.3589	34.9641	41.072	41.6593	34.6427	45.9337	1093.26	1126.18	1086.83	1151.09	1038.36	1103.23	1062.33	1123.77	1111.63	1114.84
104	CC(c1ccccc1C)C	1034	*	*	#	-	*	-	*	+	*	-	55.9997	38.5568	36.9655	56.4567	42.4487	34.1348	39.2205	39.739	33.517	47.4134	1093.89	1139.82	1055.74	1074.66	1085.87	1083.37	1019.3	1073.85	1082.82	1147.19
105	CC1(C)C2CC3C1C3(C2)C	1000	-	#	*	+	+	*	#	-	#	*	57.9421	32.1326	33.8302	50.7338	39.6779	30.5831	36.3638	35.8008	28.8951	42.0251	1008.91	970.161	992.917	979.293	1022.87	998.3	952.918	971.465	964.57	1029.38
106	CC1(C)C2CCC1(C)C=C2	1027	+	#	#	-	*	+	+	+	#	+	38.4845	36.2349	37.0133	54.5975	39.9552	33.0392	40.5326	36.1965	32.4902	42.9356	1047.11	1078.5	1056.7	1043.68	1029.18	1057.13	1049.79	981.752	1056.55	1049.29
107	CC1(C)CC=CC23C1=CC(C3(C)C)CC2	1365	*	*	+	+	+	*	-	*	-	+	59.9623	51.6343	54.1218	78.3144	55.2811	48.0131	56.2624	55.0241	45.4135	59.9237	1396.27	1485.19	1399.51	1438.91	1377.61	1415.78	1415.32	1471.2	1387.21	1420.71
108	CC1(C)CCC2C3(C41CCC(C4)C3(C)C)O2	1544	#	*	*	+	#	-	*	*	+	*	47.6439	52.6251	59.1707	80.9591	59.2985	53.9733	62.6151	59.2184	55.937	68.312	1505.5	1511.35	1500.67	1482.98	1468.95	1558.54	1562.95	1580.24	1656.46	1604.11
109	CC12C3C1CC(C2(C)C)C3	934	-	#	*	-	+	*	*	-	#	-	61.2004	32.0343	33.1755	50.3913	37.9437	30.7286	35.7099	34.6645	33.3076	39.5029	933.139	967.564	979.799	973.584	983.446	1001.79	937.724	941.924	1077.47	974.236
110	CC12CCC(CC1)C(O2)(C)C	1042	-	*	-	-	-	+	#	#	+	+	55.0859	38.6423	43.5684	59.9079	45.6156	37.3205	47.224	38.5442	34.5341	51.3164	988.048	1142.08	1188.05	1132.17	1157.87	1159.68	1205.29	1042.78	1108.85	1232.52
111	CC1=C2C3C(C3(C)C)CCC2(CCC1)C	1398	+	-	+	#	*	+	+	+	+	-	42.0786	51.1982	55.6932	80.0778	58.1424	48.7713	57.8877	55.382	47.0588	62.0099	1476.23	1473.67	1431	1468.29	1442.66	1433.94	1453.09	1480.51	1429.31	1466.32
112	CC1=C2C=C(CCC2(CCC1)C)C(C)C	1501	*	-	#	#	*	*	*	*	#	*	53.9788	53.0996	58.9725	81.5385	61.1847	51.5147	60.9728	55.0609	49.0866	66.5515	1534.96	1523.88	1496.7	1492.64	1511.83	1499.65	1524.79	1472.16	1481.19	1565.62
113	CC1=C2CC3C(C2(CC1)C(C)CC3)(C)C	1420	*	+	*	*	+	-	+	*	*	#	48.8481	52.3269	54.7675	78.6268	59.4541	51.6085	57.084	54.012	45.9034	63.6916	1494.65	1503.48	1412.45	1444.11	1472.49	1501.9	1434.42	1444.89	1399.75	1503.09
114	CC1=CC(=O)C(=C(C)C)CC1	1339	#	*	#	-	+	+	-	#	#	-	42.3473	41.4713	45.8627	64.5504	48.617	39.8632	47.6403	48.0234	39.7781	50.1314	1248.3	1216.79	1234.02	1209.54	1226.1	1220.58	1214.96	1289.21	1243.02	1206.61
115	CC1=CC(=O)C(CC1)C(C)C	1273	-	+	-	+	+	-	#	*	*	*	40.7939	41.4383	43.1983	63.5856	48.2714	39.7569	48.2885	44.4603	40.1406	51.0391	1231.99	1215.92	1180.63	1193.46	1218.25	1218.03	1230.03	1196.58	1252.3	1226.46
116	CC1=CC(=O)C2(C1C2)C(C)C	1187	*	*	*	-	+	+	+	-	+	#	46.6317	39.179	42.6602	60.0473	47.5738	38.0395	45.3387	43.3235	39.8454	49.4156	1176.26	1156.25	1169.85	1134.5	1202.39	1176.9	1161.48	1167.03	1244.75	1190.96
117	CC1=CC(CCC1)C(=C)C	1260	*	+	+	+	#	-	+	+	+	+	49.0266	37.4988	38.6373	57.3571	43.3586	34.1332	40.6636	39.447	32.7434	45.8873	1102.26	1111.88	1089.24	1089.67	1106.55	1083.33	1052.84	1066.25	1063.03	1113.82
118	CC1=CC2=C(CC1)C(C)CCC2C(C)C	1488	*	-	+	*	#	#	-	*	+	*	59.9499	53.0667	57.5617	78.9342	59.331	50.7986	57.7024	56.1405	48.1292	62.4807	1437.22	1523.01	1468.43	1449.24	1469.69	1482.5	1448.79	1500.22	1456.7	1476.61
119	CC1=CC2=C(CCC(C2CC1)C)C(C)C	1530	*	-	-	-	*	*	#	*	#	*	36.6584	53.6161	57.7201	80.4303	61.8238	50.9136	60.8235	56.6753	50.5876	64.0233	1494.76	1537.52	1471.61	1474.17	1526.36	1485.26	1521.32	1514.13	1519.59	1510.34
120	CC1=CC2C(=C(C)CCC2C(C)C)CC1	1533	*	#	-	-	+	-	-	*	#	*	42.8308	53.9337	57.0411	81.7148	59.438	52.8444	57.8311	58.7325	50.0405	63.7898	1498.56	1545.91	1458	1495.57	1472.12	1531.5	1451.78	1567.61	1505.6	1505.23
121	CC1=CC2C(=CC1)C(C)CCC2C(C)C	1538	#	*	*	-	#	-	-	#	+	#	41.8085	53.3568	58.8018	77.9313	58.412	49.8974	59.2516	57.4595	49.9532	64.2152	1522.86	1530.68	1493.28	1432.52	1448.79	1460.92	1484.79	1534.51	1503.36	1514.54
122	CC1=CC2C(CC1)(O)C(C)CCC2C(C)C	1674	-	-	-	-	#	*	*	*	-	+	44.4984	57.0671	62.9399	88.1799	65.4247	58.7145	64.8293	63.5468	53.3141	67.2217	1566.33	1628.66	1576.2	1603.31	1608.22	1672.1	1614.4	1692.76	1589.36	1580.27
123	CC1=CC2C(CC1)C(=C)CCC2C(C)C	1505	+	*	+	*	-	*	-	+	+	+	43.4242	51.803	58.7526	82.9324	60.5888	51.0469	59.8668	55.1698	49.2133	64.8332	1489.39	1489.64	1492.3	1515.86	1498.28	1488.45	1499.08	1474.99	1484.43	1528.05
124	CC1=CC2C(CC1)C(=CCC2C(C)C)C	1520	#	-	#	-	#	+	#	+	*	*	39.3793	52.5268	59.5502	82.1172	60.9034	51.0103	61.034	56.5216	49.5781	64.9468	1490.42	1508.76	1508.28	1502.28	1505.43	1487.57	1526.21	1510.13	1493.77	1530.53
125	CC1=CC2C(CC1)C(=CCCC2(C)C)C	1500	-	-	#	#	+	*	*	*	*	#	43.0317	52.5962	57.8055	79.9955	60.597	50.2793	58.4823	55.7856	49.3156	64.5445	1474.98	1510.59	1473.32	1466.92	1498.47	1470.06	1466.91	1491	1487.05	1521.73
126	CC1=CC2C(CC1)C(C)(O)CCC2C(C)C	1638	-	-	-	*	#	*	+	+	*	*	45.1072	56.5776	63.1901	86.7086	65.0167	56.6046	65.6658	62.3755	51.9532	69.1435	1565.08	1615.73	1581.21	1578.79	1598.95	1621.57	1633.84	1662.31	1554.54	1622.29
127	CC1=CC2C(CC1)C2(C)C	1014	+	-	*	+	+	*	*	-	#	*	45.6687	35.5693	36.0246	55.0621	41.2956	32.9796	38.9781	38.3909	32.3165	43.555	1029.55	1060.92	1036.89	1051.42	1059.65	1055.7	1013.67	1038.8	1052.11	1062.83
128	CC1=CC2C3(CC1)C(C)CCC3C(O2)(C)C	1554	+	#	#	+	-	*	+	+	-	#	42.8009	52.1281	62.1827	84.1521	63.1429	51.6344	64.4825	58.3731	50.6447	68.7573	1518.84	1498.23	1561.03	1536.19	1556.35	1502.52	1606.34	1558.26	1521.06	1613.84
129	CC1=CC2C3(CC1)C(C)CCC3C2(C)C	1420	#	*	+	+	*	+	*	*	+	-	41.4931	49.7494	52.9642	77.3175	57.2211	47.5138	56.1337	54.1703	48.8533	60.5329	1456.49	1435.41	1376.31	1422.3	1421.72	1403.83	1412.33	1449	1475.22	1434.03
130	CC1=CC=C(CC1)C(=C)C	1125	*	-	-	*	#	#	-	#	*	+	42.7299	36.4985	38.4475	58.0698	43.7722	35.3006	40.3118	39.6358	32.2289	44.4397	1066.12	1085.46	1085.44	1101.54	1115.96	1111.3	1044.66	1071.16	1049.87	1082.17
131	CC1=CC=C(CC1)C(C)C	1025	#	-	-	#	#	#	#	+	+	*	56.9392	36.3047	36.1655	57.6565	41.1721	36.2414	41.0707	40.2101	33.0892	44.5527	1005.05	1080.34	1039.71	1094.66	1056.84	1133.83	1062.3	1086.09	1071.88	1084.64
132	CC1=CC=C(CC1)C1(C)CCCC1(C)C	1512	-	-	*	-	-	*	*	-	*	-	56.8544	52.7445	53.245	82.3855	57.9815	50.0347	59.5579	55.0917	46.6605	63.349	1426.34	1514.51	1381.94	1506.75	1439	1464.2	1491.91	1472.96	1419.12	1495.6
133	CC1=CC=CC(C1C)(C)C	1135	+	*	*	-	*	#	*	-	-	-	38.109	34.7888	38.7415	55.2025	39.2352	32.51	40.436	40.1056	30.6314	45.7096	1035.05	1040.31	1091.33	1053.76	1012.81	1044.45	1047.55	1083.37	1008.99	1109.94
134	CC1=CC=CC(C=C1)(C)C	980	+	*	#	-	+	#	*	-	-	-	61.0134	35.3095	37.4731	57.95	38.4695	34.364	40.2093	40.9107	32.7085	44.3237	1036.3	1054.06	1065.91	1099.55	995.4	1088.86	1042.28	1104.3	1062.14	1079.64
135	CC1=CC=CC(CC1=O)(C)C	1233	*	*	*	#	#	*	#	*	#	*	40.6352	43.5035	43.4843	60.5355	46.9356	43.253	44.9422	45.9463	37.6303	48.1938	1192.39	1270.46	1186.36	1142.63	1187.88	1301.77	1152.26	1235.21	1188.07	1164.25
136	CC1=CCC(=C(C)C)CC1	1093	*	#	#	*	#	#	-	-	+	*	41.2983	38.1239	41.4276	58.5998	41.2232	36.011	41.6573	40.9605	34.4749	45.5807	1063.28	1128.39	1145.15	1110.38	1058.01	1128.31	1075.93	1105.6	1107.33	1107.12
137	CC1=CCC(=CC1)C(C)C	1066	#	#	+	*	#	-	-	*	+	*	54.2251	36.962	42.4209	57.3717	41.0166	33.8569	43.7645	39.2393	35.6583	46.5019	1119.48	1097.7	1165.05	1089.91	1053.31	1076.72	1124.9	1060.85	1137.61	1127.26
138	CC1=CCC(C)(C)C=CCC(=CCC1)C	1469	*	+	#	*	*	-	#	*	*	+	51.496	52.5347	59.5029	86.0091	57.6468	51.9696	60.033	55.0206	49.9568	64.7335	1493.08	1508.97	1507.33	1567.13	1431.4	1510.55	1502.95	1471.11	1503.46	1525.87
139	CC1=CCC(C=C1)C(C)C	1016	*	#	*	+	#	*	*	#	*	*	41.5928	35.4511	36.9737	58.7118	42.3251	34.1408	40.4128	39.0712	33.8834	43.7395	1028.84	1057.8	1055.9	1112.24	1083.06	1083.51	1047.01	1056.48	1092.2	1066.86
140	CC1=CCC(C=C1)C(O)(C)C	1185	+	-	-	*	+	+	-	*	+	#	61.1175	41.2946	44.3398	65.6233	48.5678	41.7428	47.5123	45.0315	37.705	51.0167	1126.6	1212.12	1203.5	1227.42	1224.99	1265.6	1211.99	1211.43	1189.98	1225.97
141	CC1=CCC(CC1)(O)C(C)C	1197	+	+	+	*	*	#	*	+	#	#	57.0526	41.1385	44.2079	66.4287	46.593	42.2396	44.6363	44.6326	37.1572	49.0597	1173.47	1208	1200.86	1240.84	1180.09	1277.5	1145.16	1201.06	1175.97	1183.18
142	CC1=CCC(CC1)C(=C)C	1037	-	-	*	*	-	-	-	+	-	-	53.4102	37.159	38.5095	57.9322	42.6437	34.8453	40.9584	39.1246	32.5161	45.2678	1043.87	1102.9	1086.68	1099.25	1090.3	1100.39	1059.69	1057.87	1057.22	1100.28
143	CC1=CCC(CC1)C(=O)C	1147	*	#	#	-	*	+	#	*	*	+	50.5211	37.0857	37.7425	59.1154	45.4585	36.0981	41.7874	42.8166	34.9607	45.9162	1076.27	1100.97	1071.31	1118.97	1154.29	1130.39	1078.95	1153.85	1119.76	1114.45
144	CC1=CCC(CC1)C(N)(C)C	1187	#	+	+	*	#	*	*	*	#	+	52.3936	40.9895	44.9665	64.0855	43.636	36.1746	42.4786	40.7765	34.5425	48.8334	1120.57	1204.07	1216.06	1201.79	1112.86	1132.23	1095.02	1100.82	1109.07	1178.24
145	CC1=CCC(CC1)C(O)(C)C	1213	*	+	#	*	+	#	+	#	+	#	54.8197	41.6694	44.4946	65.5632	47.2253	40.1992	46.6663	43.8817	36.4781	50.6272	1160.88	1222.02	1206.6	1226.42	1194.46	1228.63	1192.33	1181.54	1158.59	1217.45
146	CC1=CCC2(C1C2)C(C)C	930	+	*	#	+	+	-	-	#	#	#	51.4346	34.1432	36.2923	52.9888	40.4428	31.1687	38.7345	35.9103	33.1515	41.8608	996.588	1023.26	1042.25	1016.87	1040.26	1012.33	1008.01	974.312	1073.47	1025.79
147	CC1=CCC2(C3(C1C3)C(C)(C)CCC2)C	1456	-	*	*	*	+	-	-	+	*	-	43.1358	50.3609	53.8385	75.8416	58.1071	50.6626	58.5086	56.4377	47.908	64.5353	1439.57	1451.56	1393.83	1397.7	1441.86	1479.24	1467.52	1507.95	1451.03	1521.53
148	CC1=CCC2(CC1)C(=C)CCCC2(C)C	1488	*	*	+	*	*	#	#	-	-	*	58.8317	52.5629	55.1994	82.4732	60.5535	50.3216	57.5854	53.9471	49.8208	63.8405	1443.35	1509.71	1421.1	1508.21	1497.48	1471.08	1446.07	1443.2	1499.98	1506.34
149	CC1=CCC2(CC1)OC2(C)C	1156	*	-	-	#	*	*	*	*	*	+	43.4537	41.6397	40.2903	65.2495	45.1068	37.8237	42.354	41.3924	36.136	47.834	1100.89	1221.24	1122.36	1221.19	1146.3	1171.73	1092.12	1116.83	1149.84	1156.39
150	CC1=CCC2C(=C1)C(CCC2C)C(C)C	1467	-	*	*	*	*	*	*	*	-	#	58.217	50.8763	57.0718	80.5959	59.03	50.4034	59.3365	56.1886	48.38	64.1066	1450.97	1465.17	1458.62	1476.93	1462.84	1473.04	1486.76	1501.47	1463.11	1512.16
151	CC1=CCC2C(C(=C)CCC1)CC2(C)C	1505	#	-	#	#	#	+	*	#	-	*	47.7584	52.099	55.999	82.1732	59.8998	51.0257	57.5443	53.9967	49.9243	64.2672	1472.57	1497.46	1437.12	1503.21	1482.62	1487.94	1445.11	1444.49	1502.62	1515.67
152	CC1=CCC2C(C1)C2(C)C	1061	#	-	*	*	#	-	#	*	-	*	58.923	35.9782	35.2413	56.3413	42.4757	34.1124	40.2083	39.5096	32.9074	43.0596	1044.07	1071.72	1021.19	1072.74	1086.48	1082.83	1042.26	1067.88	1067.23	1052
153	CC1=CCC2CC1C2(C)C	937	*	#	-	-	*	#	*	-	-	-	57.6039	34.8357	35.95	55.1121	40.8255	32.1362	40.1291	37.0863	32.0201	42.7881	981.919	1041.55	1035.39	1052.25	1048.97	1035.5	1040.42	1004.88	1044.53	1046.06
154	CC1=CCC=C(C)CC=CC(CC1)(C)C	1552	*	+	*	*	+	+	*	*	+	-	56.2243	53.6235	61.672	86.1736	58.5839	51.4105	60.0353	57.7828	53.8683	65.7516	1589.74	1537.72	1550.79	1569.88	1452.7	1497.16	1503	1542.92	1603.53	1548.13
155	CC1=CCCC(=C)C2C(CC1)C(C2)(C)C	1447.33	+	#	*	*	-	-	+	*	#	*	37.8672	51.5512	56.7669	82.8991	58.6503	51.9724	56.5782	53.3165	48.5059	64.5757	1459.68	1482.99	1452.51	1515.31	1454.21	1510.62	1422.66	1426.81	1466.33	1522.42
156	CC1=CCCC(=C)C=CC(CC1)C(C)C	1496	-	-	*	-	+	*	*	*	+	+	42.5203	50.842	57.0166	85.2749	59.4877	51.1801	58.0827	53.1608	49.7912	64.7836	1498.74	1464.26	1457.51	1554.9	1473.25	1491.64	1457.63	1422.76	1499.22	1526.96
157	CC1=CCCC(=CC2C(CC1)C2(C)C)C	1513	*	*	+	*	*	*	+	*	*	#	42.5645	51.6804	55.3148	81.7566	59.4075	51.1082	56.3513	55.2357	49.0064	64.1208	1445.15	1486.4	1423.41	1496.27	1471.42	1489.92	1417.39	1476.7	1479.14	1512.47
158	CC1=CCCC(=CCC(=C(C)C)CC1)C	1578	*	+	*	#	-	*	+	*	+	#	56.8782	53.1785	58.4036	83.8769	58.8716	53.2237	59.1005	55.2984	49.2749	67.1226	1474.48	1525.97	1485.3	1531.6	1459.24	1540.59	1481.28	1478.33	1486.01	1578.1
159	CC1=CCCC(=CCC1)C	1047	+	+	-	+	*	+	*	-	+	+	39.4539	36.22	36.9454	59.4802	41.6357	37.0846	39.899	38.4353	32.4992	45.4072	1017.48	1078.11	1055.34	1125.05	1067.38	1154.02	1035.07	1039.95	1056.79	1103.33
160	CC1=CCCC(C1)C(=C)C	1032	-	*	*	+	-	#	+	+	-	+	46.5594	37.5064	38.7249	57.6987	42.7324	35.4483	42.1687	38.9394	32.3499	44.5211	1020.23	1112.08	1090.99	1095.36	1092.32	1114.83	1087.81	1053.06	1052.96	1083.95
161	CC1=CCCC2(C)OC2CC(C=CC1)(C)C	1635	-	-	-	-	*	#	#	#	*	-	57.9517	56.5184	65.0059	89.6763	61.0887	55.4894	63.7968	63.4063	55.4472	68.5378	1548.42	1614.17	1617.6	1628.25	1509.65	1594.85	1590.41	1689.11	1643.93	1609.04
162	CC1=CCCC2(C1CC(=C(C)C)CC2)C	1539	*	*	*	-	-	-	-	+	*	+	55.8349	51.9834	56.7729	78.4745	60.0802	51.5618	58.1245	55.2215	49.9652	64.0019	1427.18	1494.4	1452.63	1441.58	1486.72	1500.78	1458.6	1476.33	1503.67	1509.87
163	CC1=CCCC2(C1CC(CC2)C(=C)C)C	1521.5	+	+	#	*	*	#	+	*	#	#	56.8109	51.0348	58.8354	78.1699	60.2451	49.3442	58.3913	54.814	49.0493	64.4972	1432.27	1469.36	1493.96	1436.5	1490.47	1447.67	1464.8	1465.74	1480.24	1520.7
164	CC1=CCCC2(C31CCC2C(C3)(C)C)C	1468	*	-	-	#	+	*	*	#	#	-	57.6434	52.2186	54.7695	84.6174	59.8245	50.5418	56.6781	55.3311	48.4854	62.5144	1457.08	1500.62	1412.49	1543.94	1480.91	1476.35	1424.98	1479.18	1465.81	1477.35
165	CC1C=CC(C(=O)C1)C(C)C	1275	#	*	-	-	-	*	-	+	*	-	57.8216	39.1305	42.7312	65.0524	47.4237	37.8387	46.3736	44.7837	38.9861	47.9121	1218.81	1154.97	1171.27	1217.9	1198.97	1172.09	1185.53	1204.99	1222.76	1158.09
166	CC1C=CC2(C1C2)C(C)C	996	+	-	*	*	-	+	*	*	+	-	36.5804	32.8305	36.6653	54.6588	39.8742	29.039	37.136	36.683	33.9753	40.9385	1035.95	988.591	1049.72	1044.7	1027.34	961.316	970.862	994.399	1094.55	1005.62
167	CC1C=CC2C(C1)C2(C)C	1097	*	+	#	*	*	-	*	*	+	+	57.4292	34.532	37.3724	55.0005	40.9293	32.4817	39.4437	38.2881	32.8578	42.9897	1046.4	1033.53	1063.89	1050.4	1051.33	1043.78	1024.49	1036.13	1065.96	1050.47
168	CC1CC=C2C(C1)C(CCC2C)C(C)C	1551	#	-	*	+	-	+	#	-	-	+	47.631	51.1059	58.4926	79.8776	58.7814	50.2881	59.5093	55.1515	47.9897	61.9297	1498.97	1471.23	1487.09	1464.96	1457.19	1470.27	1490.78	1474.51	1453.12	1464.57
169	CC1CCC(=C(C)C)C(=O)C1	1258	*	#	#	*	*	*	#	#	#	+	45.2848	42.901	45.9601	64.8174	50.5366	41.7043	48.427	46.8744	40.5931	50.1777	1255.44	1254.55	1235.97	1213.99	1269.74	1264.68	1233.24	1259.34	1263.88	1207.63
170	CC1CCC(=C(C)C)C=C1	957	*	*	+	-	#	-	+	+	+	*	48.9766	37.5426	40.1671	58.2096	44.0391	35.0532	43.4414	41.7028	36.0453	45.736	1084.22	1113.03	1119.89	1103.87	1122.02	1105.37	1117.39	1124.9	1147.51	1110.51
171	CC1CCC(C(=O)C1)(C)C(C)C	1306	-	#	+	+	-	-	+	+	+	+	49.2637	40.8437	45.9356	70.3269	49.0688	40.9084	49.2073	48.7773	40.1895	49.4342	1245.48	1200.22	1235.48	1305.8	1236.38	1245.61	1251.38	1308.81	1253.55	1191.37
172	CC1CCC(C(=O)C1)C(=C)C	1192	+	*	#	-	-	+	*	*	*	+	45.2848	39.9927	43.2938	63.1617	47.9583	38.1754	47.2352	44.5813	37.7356	48.7873	1218.75	1177.74	1182.54	1186.4	1211.13	1180.15	1205.55	1199.73	1190.76	1177.23
173	CC1CCC(C(=O)C1)C(C)C	1177	*	-	*	*	*	+	*	-	*	-	48.9766	38.0948	42.0566	61.3521	44.2694	37.0721	44.4538	42.852	36.2628	45.5505	1135.96	1127.62	1157.75	1156.24	1127.26	1153.72	1140.91	1154.77	1153.08	1106.46
174	CC1CCC(CC2=C1CCC2C)C(O)(C)C	1617	-	*	+	-	*	-	-	#	-	+	53.2353	56.8563	65.0589	84.4647	64.5022	56.5083	63.9668	63.2848	52.3781	69.1159	1578.87	1623.1	1618.66	1541.4	1587.25	1619.26	1594.36	1685.95	1565.41	1621.68
175	CC1CCC2(C1C1C(C1(C)C)CCC2C)O	1593	*	+	+	*	*	-	*	#	#	*	52.5663	54.7653	61.7075	83.6953	63.4453	54.1273	62.9197	58.9916	52.1408	63.8895	1586.25	1567.87	1551.51	1528.58	1563.22	1562.23	1570.03	1574.34	1559.34	1507.41
176	CC1CCC23C1C1C(C1(C)C)CCC3(O2)C	1631	*	+	-	+	+	-	+	*	*	+	49.2977	53.6673	61.7742	81.0824	64.5078	50.3484	64.5541	55.2661	47.6099	65.407	1471.25	1538.88	1552.84	1485.03	1587.38	1471.72	1608.01	1477.49	1443.41	1540.59
177	CC1CCC2=C(C)CCC3C(C12)C3(C)C	1509	#	+	*	+	+	*	#	*	+	*	47.7124	51.1167	56.1395	78.804	58.1208	50.2608	59.0959	56.2269	48.8214	59.6616	1446.92	1471.52	1439.94	1447.07	1442.17	1469.62	1481.17	1502.47	1474.4	1414.98
178	CC1CCC2C(C34C1CCC4(O3)C)C2(C)C	1575	+	+	*	-	#	#	-	#	-	+	45.9129	54.6493	56.5915	76.0662	60.5898	51.6891	57.6697	57.8346	51.3923	64.4158	1535.06	1564.81	1449	1401.44	1498.3	1503.83	1448.03	1544.26	1540.18	1518.92
179	CC1CCC2C(C3=C(C(=O)CC13)C)C2(C)C	1788	+	#	-	+	-	#	*	#	-	-	38.0725	56.5454	62.0966	89.1192	67.2633	56.16	61.3058	61.7801	53.7413	66.0289	1622.64	1614.89	1559.3	1618.96	1650.03	1610.92	1532.53	1646.83	1600.29	1554.19
180	CC1CCC2C(C3=C(CCC13)C)C2(C)C	1421	#	#	#	*	#	-	*	#	#	-	44.9891	50.8962	55.6574	83.0707	59.92	49.1234	57.5565	55.026	48.0202	61.2004	1470.92	1465.69	1430.28	1518.17	1483.08	1442.38	1445.4	1471.25	1453.91	1448.62
181	CC1CCC2C(C3=C1CCC3C)C2(C)C	1380	+	+	*	+	+	#	-	*	*	*	38.5248	50.0827	56.2548	76.5888	56.411	48.7125	57.7474	54.4229	46.0608	62.3647	1420.5	1444.21	1442.25	1410.15	1403.3	1432.54	1449.83	1455.57	1403.77	1474.08
182	CC1CCC2C(C3C1CCC3=C)C2(C)C	1446	-	+	*	*	-	*	+	-	*	*	33.7876	49.0906	54.9949	78.4709	57.212	47.2912	57.6609	53.0469	46.1364	57.5341	1428.5	1418.01	1417	1441.52	1421.51	1398.49	1447.82	1419.8	1405.71	1368.46
183	CC1CCC2C1=CC(CCC2C)C(=C)C	1490	#	-	-	#	*	+	#	#	*	+	45.2971	51.3411	57.3344	78.5153	58.4663	48.6415	57.0939	55.569	48.1449	64.8387	1491.39	1477.44	1463.88	1442.25	1450.03	1430.84	1434.65	1485.37	1457.1	1528.17
184	CC1CCC2C1C1C(C1(C)C)CC=C2C	1471	#	+	*	+	#	*	+	#	*	-	42.4735	51.6639	57.4196	78.913	57.1443	46.9291	58.7322	53.6994	45.6083	60.1001	1495.77	1485.97	1465.59	1448.88	1419.97	1389.82	1472.72	1436.76	1392.19	1424.56
185	CC1CCC2C1C1C(C1(C)C)CCC2(C)O	1593	+	*	#	-	*	*	#	*	#	*	38.904	55.3995	61.6428	84.9039	63.2352	53.9762	63.308	57.7126	51.6743	62.4954	1525.77	1584.62	1550.21	1548.72	1558.45	1558.61	1579.05	1541.09	1547.4	1476.93
186	CC1CCC2C1C1C(C1(C)C)CCC2=C	1467.5	+	+	*	*	*	*	#	+	+	*	62.1761	50.8835	56.278	78.8676	59.4552	48.3013	58.7762	53.8286	46.3937	56.8922	1454.43	1465.36	1442.71	1448.13	1472.51	1422.69	1473.74	1440.12	1412.29	1354.43
187	CC1CCC2CC1CC2C	1179	-	*	-	*	-	#	-	*	-	-	56.7946	35.7289	40.7561	53.1354	41.1581	31.1215	42.7218	39.6336	32.0377	41.8989	1108.62	1065.14	1131.69	1019.31	1056.53	1011.2	1100.67	1071.11	1044.98	1026.62
188	CC1CCCC(C1=O)(C)C	1047	+	+	#	-	+	#	-	+	+	+	63.9712	37.2282	41.1601	54.4838	42.0815	36.2223	41.8431	41.3997	31.8927	43.238	1068.77	1104.73	1139.79	1041.78	1077.52	1133.37	1080.25	1117.02	1041.27	1055.9
189	CC=C(C=CC=C(C)C)C	1132	+	#	#	#	-	-	#	#	+	-	57.8535	37.2201	38.9753	52.7753	41.4931	33.8532	41.1368	40.3627	32.9725	43.6856	1011.22	1104.52	1096.01	1013.31	1064.14	1076.63	1063.83	1090.06	1068.9	1065.69
190	CC=Cc1ccc(c(c1)OC)O	1403	-	+	+	+	#	+	#	+	-	#	61.2794	46.9233	53.6583	72.5326	56.1619	45.5082	55.6638	52.9226	45.0227	57.6345	1401.27	1360.77	1390.22	1342.56	1397.64	1355.79	1401.41	1416.57	1377.21	1370.66
191	CC=Cc1ccc(cc1)OC	1261.5	+	*	+	-	-	*	*	#	#	*	43.4743	43.0077	44.8002	70.2994	47.807	42.7788	49.4486	47.9547	40.424	54.3098	1245.88	1257.37	1212.73	1305.34	1207.69	1290.41	1256.99	1287.42	1259.55	1297.97
192	CC=Cc1ccc2c(c1OC)OCO2	1564	*	#	*	-	-	*	*	+	-	*	48.6203	52.2434	59.204	74.4341	62.2936	52.2733	58.6378	55.3762	47.7977	65.959	1400.44	1501.27	1501.34	1374.24	1537.04	1517.82	1470.52	1480.36	1448.21	1552.66
193	CCC(C(C)C)CC(C)C	987	#	+	*	-	*	#	+	+	-	*	56.642	34.1871	34.0932	54.1973	36.8993	30.0339	35.3392	34.4246	29.5568	39.025	973.404	1024.42	998.188	1037.01	959.703	985.147	929.108	935.689	981.501	963.789
194	CCC(CCC(C(C)C)OC(=O)C)C	1372	+	#	#	#	*	+	*	#	+	#	57.2115	46.6337	49.8353	72.0133	51.3678	42.8746	52.4653	48.1021	43.4305	55.2173	1324.72	1353.12	1313.62	1333.9	1288.64	1292.71	1327.09	1291.25	1336.47	1317.81
195	CCC(CCC(CC(C(C)C)C)C)C	1318	+	-	#	#	*	#	*	-	+	*	62.7666	47.2362	47.3248	72.6344	49.6572	42.8339	49.5284	47.3577	41.9823	51.7782	1283	1369.04	1263.31	1344.25	1249.75	1291.73	1258.84	1271.9	1299.42	1242.62
196	CCC12CC3CC(C1)CC(C2)(C3)C=C	1514	*	*	-	+	+	+	+	*	-	#	43.0648	47.7809	52.2345	74.3346	55.0436	49.5491	54.5065	48.3653	45.2594	61.6841	1376.18	1383.42	1361.69	1372.59	1372.21	1452.57	1374.52	1298.1	1383.27	1459.2
197	CCCC(=O)OC(CCC=C(C)C)(C=C)C	1363	#	+	+	+	*	+	-	+	#	-	58.9582	51.425	59.7862	80.4259	60.3578	52.1008	58.6821	57.3267	48.7418	65.3972	1486.13	1479.66	1513.01	1474.09	1493.03	1513.69	1471.56	1531.06	1472.37	1540.38
198	CCCC(=O)OCC(C)C	961	*	+	#	+	#	+	-	*	#	*	61.3602	32.4614	34.1649	52.5155	37.0046	30.8577	36.9431	36.7395	30.2326	40.3065	1000.26	978.843	999.624	1008.98	962.097	1004.88	966.38	995.867	998.791	991.806
199	CCCCC1C(C)CCCC1(C)C	1228	-	#	+	#	*	+	*	*	#	*	54.6639	44.9985	47.4977	68.7897	50.8979	42.5064	52.1584	45.7651	39.3427	52.7651	1275.09	1309.94	1266.78	1280.18	1277.96	1283.89	1319.96	1230.5	1231.88	1264.2
200	CCCCC1CCC=CC1	1177	-	#	*	#	*	+	*	#	#	#	55.8228	36.5663	42.8477	59.2069	43.3326	35.8362	42.9068	40.9877	34.814	42.6499	1115.22	1087.25	1173.61	1120.49	1105.96	1124.12	1104.97	1106.31	1116.01	1043.04
201	CCCCCC(=O)OC	932	*	*	*	*	*	*	+	-	*	*	51.0104	31.1322	35.2987	49.5079	36.3584	28.0982	35.4543	32.6007	26.5041	40.1989	959.988	943.741	1022.34	958.864	947.404	938.782	931.784	888.275	903.393	989.453
202	CCCCCC(CCCC(C)C)C	1213	+	*	-	-	*	*	*	*	#	-	34.2654	44.6751	45.3608	68.31	48.934	41.6862	47.843	44.6281	40.1762	51.4716	1251.14	1301.4	1223.96	1272.19	1233.31	1264.24	1219.67	1200.94	1253.21	1235.91
203	CCCCCC=CC=CC(=O)OCC	1488	+	#	#	+	*	*	#	*	*	+	52.8554	46.3143	53.3329	72.2845	52.9286	44.4189	58.6097	54.0475	45.3409	58.8874	1471.04	1344.69	1383.7	1338.42	1324.13	1329.7	1469.87	1445.81	1385.35	1398.05
204	CCCCCC=CCCO	1143	-	#	+	*	+	-	*	*	+	-	45.1453	38.6742	43.1023	58.7833	44.8846	39.4097	43.3216	46.752	37.387	44.9177	1077.02	1142.92	1178.71	1113.43	1141.25	1209.71	1114.61	1256.16	1181.84	1092.62
206	CCCCCCC(=O)C	997	*	*	+	#	*	*	#	*	+	*	43.4751	32.0328	33.6475	50.5028	39.8502	31.0713	37.5395	36.9986	29.7256	40.2913	948.22	967.526	989.257	975.443	1026.79	1009.99	980.239	1002.6	985.819	991.474
207	CCCCCCC(C(C(C)C)C)C	1260	#	*	+	#	+	+	*	*	#	-	45.286	44.4892	46.8863	69.5343	49.4081	41.079	49.2344	44.8173	40.2702	50.4148	1245.16	1296.49	1254.53	1292.59	1244.09	1249.7	1252.01	1205.86	1255.61	1212.81
208	CCCCCCC(CCCC)C	1155	#	*	+	#	+	*	#	-	#	*	57.7109	41.3708	42.248	62.7754	46.1951	39.0661	44.932	41.6171	37.3817	50.2058	1187.46	1214.14	1161.59	1179.96	1171.04	1201.49	1152.03	1122.67	1181.71	1208.24
209	CCCCCCC(CCCCC)C	1251	#	-	-	#	#	*	*	*	+	*	58.2593	44.7914	46.2569	67.8201	50.2853	42.4758	48.7452	45.1761	40.7792	54.2024	1278.25	1304.47	1241.92	1264.03	1264.03	1283.16	1240.64	1215.19	1268.64	1295.62
210	CCCCCCC1CCCCC1	1247	#	*	+	-	-	-	+	+	-	+	41.9968	44.7023	48.5282	66.1642	51.2304	42.3346	50.4218	46.9061	40.7469	50.8354	1285.32	1302.12	1287.43	1236.43	1285.52	1279.77	1279.6	1260.16	1267.81	1222.01
211	CCCCCCC=CCCCCCC	1396	+	#	*	-	#	*	+	+	*	*	54.4707	49.1269	57.5448	75.6144	57.6382	47.6738	56.9928	52.5549	45.6407	58.4465	1382.99	1418.97	1468.1	1393.91	1431.2	1407.66	1432.3	1407.01	1393.02	1388.41
212	CCCCCCCC(=O)C	1083	*	*	-	+	*	*	#	#	*	*	54.2261	35.4534	37.6565	55.5474	43.9405	34.481	41.3527	40.5576	33.123	44.2879	1039.01	1057.86	1069.59	1059.51	1119.78	1091.66	1068.85	1095.12	1072.75	1078.85
213	CCCCCCCC(CC(C)C)C	1253	+	-	-	*	*	-	-	-	-	*	44.7242	44.7507	45.8459	68.4811	49.7458	41.3139	47.9211	45.1157	40.2447	52.378	1258.43	1303.39	1233.68	1275.04	1251.77	1255.32	1221.49	1213.62	1254.96	1255.73
214	CCCCCCCC(CCC)C	1159	#	#	*	#	*	#	*	#	*	+	58.2972	41.3708	42.248	62.7754	46.1951	39.0661	44.932	41.6171	37.3817	50.2058	1187.46	1214.14	1161.59	1179.96	1171.04	1201.49	1152.03	1122.67	1181.71	1208.24
215	CCCCCCCC(CCCC)C	1253	*	*	+	+	*	#	*	*	*	*	45.1386	44.7914	46.2569	67.8201	50.2853	42.4758	48.7452	45.1761	40.7792	54.2024	1278.25	1304.47	1241.92	1264.03	1264.03	1283.16	1240.64	1215.19	1268.64	1295.62
216	CCCCCCCC(CCCCC)C	1316	+	+	+	+	*	-	#	*	#	-	57.6149	48.2119	50.2659	72.8647	54.3756	45.8856	52.5584	48.7351	44.1766	58.199	1369.04	1394.8	1322.24	1348.09	1357.03	1364.83	1329.25	1307.71	1355.56	1383
217	CCCCCCCC=CCCCC	1289	+	+	-	+	-	+	#	*	-	-	55.6116	45.7063	53.5358	70.5697	53.548	44.2641	53.1796	48.9959	42.2433	54.45	1292.2	1328.63	1387.77	1309.85	1338.21	1325.99	1343.69	1314.49	1306.1	1301.03
218	CCCCCCCCC(CCC)C	1257	#	*	*	*	*	#	*	#	+	*	55.9361	44.7914	46.2569	67.8201	50.2853	42.4758	48.7452	45.1761	40.7792	54.2024	1278.25	1304.47	1241.92	1264.03	1264.03	1283.16	1240.64	1215.19	1268.64	1295.62
219	CCCCCCCCC=CCCCC	1391	#	-	-	*	*	-	*	+	+	*	50.0125	49.1269	57.5448	75.6144	57.6382	47.6738	56.9928	52.5549	45.6407	58.4465	1382.99	1418.97	1468.1	1393.91	1431.2	1407.66	1432.3	1407.01	1393.02	1388.41
220	CCCCCCCCC=CCCCCCCC	1679	*	*	-	#	*	+	-	*	+	#	41.4796	59.3885	69.5715	90.7483	69.9091	57.903	68.4325	63.2318	55.833	70.4363	1655.36	1689.97	1709.08	1646.11	1710.18	1652.67	1698.13	1684.57	1653.8	1650.55
221	CCCCCCCCCC(=O)C	1303	-	#	+	-	#	-	-	*	+	*	53.7755	42.2945	45.6743	65.6367	52.121	41.3005	48.9792	47.6756	39.9179	52.281	1220.59	1238.53	1230.24	1227.64	1305.77	1255	1246.08	1280.17	1246.6	1253.61
222	CCCCCCCCCC(C)C	1163	+	+	+	+	+	+	*	*	*	+	59.4149	42.1778	43.4294	64.3326	48.067	39.2953	45.8352	42.6291	38.0252	50.0396	1198.03	1235.45	1185.26	1205.91	1213.6	1206.97	1173.02	1148.98	1198.17	1204.61
223	CCCCCCCCCC(CC)C	1270	-	#	*	+	*	+	*	#	*	*	57.7759	45.1892	46.4437	68.2546	50.8943	42.328	48.1808	45.9759	40.9009	54.3156	1279.48	1314.98	1245.66	1271.27	1277.88	1279.62	1227.52	1235.98	1271.75	1298.1
224	CCCCCCCCCCCCCCC=C	1590	+	#	*	#	#	+	*	*	+	#	44.8291	56.1904	60.1544	86.9348	68.7571	55.5656	63.3132	59.1523	52.8096	65.8305	1573.3	1605.51	1520.39	1582.56	1683.99	1596.68	1579.17	1578.52	1576.45	1549.85
225	CCCCCCCCCCCCCCO	1687	-	+	-	-	-	-	+	+	#	+	41.8202	57.0111	60.3803	81.7966	65.2988	54.6873	62.2323	62.6502	54.3542	66.188	1548.12	1627.18	1524.91	1496.94	1605.36	1575.64	1554.05	1669.45	1615.97	1557.67
226	CCCCCCCCCCCCO	1486	#	+	*	-	-	-	*	#	+	-	55.4405	50.17	52.3625	71.7073	57.1182	47.8678	54.6059	55.5323	47.5594	58.1949	1366.54	1446.51	1364.26	1328.8	1419.38	1412.3	1376.83	1484.41	1442.11	1382.91
227	CCCCCCCCOC(=O)C	1216	+	-	*	-	+	*	#	*	*	+	57.7803	39.9524	44.1048	62.2809	47.9979	39.2134	48.4696	43.7678	38.7036	51.0959	1156.9	1176.68	1198.79	1171.72	1212.03	1205.01	1234.23	1178.58	1215.53	1227.7
228	CCCCCCOC(=O)C	1019	-	*	*	+	+	+	#	+	*	-	57.9348	33.1113	36.087	52.1916	39.8173	32.3939	40.8432	36.6499	31.9088	43.1028	975.322	996.008	1038.14	1003.59	1026.04	1041.67	1057.01	993.538	1041.68	1052.94
229	CCCCCCOC(=O)C(CC)C	1204	*	+	+	-	#	#	*	*	*	+	40.3505	42.1776	47.8517	67.2364	49.3854	41.4939	49.9711	45.9818	41.1048	54.6763	1243.61	1235.44	1273.87	1254.3	1243.57	1259.64	1269.13	1236.13	1276.97	1305.98
230	CCCCCCOC(=O)CC(C)C	1211	+	+	*	*	+	*	+	#	*	+	45.4851	41.7962	46.9575	68.4001	48.9361	41.6263	49.5569	45.0316	40.6479	53.3166	1232.61	1225.37	1255.95	1273.69	1233.36	1262.81	1259.5	1211.43	1265.28	1276.25
231	CCCCCOC(=O)C(C)C	1062	+	*	*	+	+	*	+	*	+	*	40.2351	35.7043	39.3011	57.8685	42.5883	35.2915	44.2348	39.225	35.0473	46.2096	1067.18	1064.49	1102.54	1098.19	1089.04	1111.08	1135.83	1060.48	1121.98	1120.87
232	CCCCCc1ccco1	997	*	-	*	*	*	*	*	*	#	#	57.7119	36.8912	31.6683	54.0108	40.0461	31.9021	39.1859	37.1652	31.0931	41.3493	975.591	1095.83	949.599	1033.9	1031.24	1029.89	1018.5	1006.93	1020.81	1014.61
233	CCc1cc(C)ccc1C	1093	*	-	#	-	-	-	*	+	-	*	38.8348	36.7662	38.0813	59.3535	44.4446	34.8552	39.9406	40.7958	33.1862	47.5609	1079.3	1092.53	1078.1	1122.93	1131.24	1100.63	1036.04	1101.32	1074.36	1150.41
234	CCc1ccc(c(c1)C)C	1125	-	*	*	*	*	+	*	#	-	*	40.7633	37.1373	40.7285	62.3403	46.9339	37.6694	46.068	39.8104	34.9332	48.7405	1127.12	1102.33	1131.14	1172.71	1187.84	1168.03	1178.42	1075.7	1119.06	1176.2
235	CCc1ccc(cc1C)C	1164	-	*	#	#	-	*	*	-	*	#	44.2039	35.924	38.31	59.0676	44.3369	35.4668	39.7293	38.9718	33.6663	48.3134	1101.97	1070.29	1082.68	1118.17	1128.8	1115.27	1031.13	1053.9	1086.65	1166.86
236	CCc1cccc(c1C)C	1166	*	#	*	*	+	+	*	*	+	+	55.6899	36.318	37.1118	59.8899	45.7482	35.9142	41.0335	39.1655	33.3837	47.9719	1117.58	1080.69	1058.67	1131.87	1160.88	1125.99	1061.43	1058.94	1079.41	1159.4
237	COC(=O)C=C(CCC=C(C)C)C	1332	*	#	-	+	-	#	*	#	*	+	41.7643	47.3671	51.1833	70.7273	52.0015	45.4696	55.6117	48.7538	41.2576	56.7047	1260.16	1372.49	1340.63	1312.47	1303.05	1354.86	1400.2	1308.2	1280.88	1350.33
238	COC(=O)CC(CCC=C(C)C)C	1264	*	+	-	-	#	+	*	-	#	*	36.9267	44.1911	50.2982	69.9623	50.3659	41.2555	49.0802	46.6652	39.9665	54.9243	1221.52	1288.62	1322.89	1299.72	1265.86	1253.93	1248.42	1253.9	1247.84	1311.4
239	COC(=O)CCc1ccccc1	1293	#	#	+	*	#	*	*	-	-	+	61.6424	43.4678	44.9383	71.1005	52.6008	41.3245	51.4221	47.9072	43.8791	55.1569	1286.15	1269.51	1215.49	1318.69	1316.67	1255.58	1302.85	1286.19	1347.95	1316.49
240	COC(=O)c1ccccc1	1112	*	-	*	#	+	*	*	+	*	*	55.7629	40.9566	37.368	58.6645	43.3081	34.1022	48.5906	40.5973	35.6298	48.5703	1094.49	1203.2	1063.81	1111.45	1105.41	1082.59	1237.05	1096.16	1136.88	1172.48
241	COc1cc(C)ccc1OC	1259	-	*	+	-	+	#	-	#	+	+	56.9559	42.5208	46.4169	62.2888	48.5963	38.9999	46.6915	49.1821	37.99	53.5595	1168.13	1244.51	1245.12	1171.85	1225.63	1199.9	1192.91	1319.33	1197.27	1281.56
242	COc1ccc(cc1)CC=C	1216	+	*	#	*	*	#	#	-	*	*	55.0324	39.3252	44.3858	66.2526	48.8037	41.2714	47.5793	45.371	40.7145	53.9377	1220.59	1160.11	1204.43	1237.9	1230.35	1254.31	1213.55	1220.26	1266.98	1289.83
243	Cc1cc(cc(c1)C)C(C)C	1178	-	*	+	#	#	*	-	#	-	+	56.2479	38.7955	46.0436	66.5185	49.6163	38.973	44.6813	44.066	37.3565	52.0886	1141.71	1146.12	1237.64	1242.34	1248.82	1199.26	1146.2	1186.33	1181.06	1249.4
244	Cc1ccc(cc1)C(=C)C	1103	-	#	#	*	-	#	+	*	+	*	39.5485	36.1515	41.2565	58.7413	44.6858	34.4024	42.831	40.6068	33.4378	46.5744	1042.23	1076.3	1141.72	1112.73	1136.73	1089.78	1103.2	1096.4	1080.8	1128.84
245	Cc1ccc(cc1)C(C)C	1025	+	*	-	-	*	+	-	#	-	+	48.0487	35.7782	41.8067	60.1571	44.2836	35.1644	40.7025	40.7145	34.2179	45.8394	1054.62	1066.44	1152.75	1136.33	1127.58	1108.03	1053.74	1099.2	1100.76	1112.78
246	Cc1ccc(cc1)C(O)(C)C	1216	*	#	*	*	-	+	+	*	#	#	41.0864	40.2725	47.3997	67.045	49.3784	40.2676	47.8231	44.1843	39.7836	52.8593	1211.86	1185.13	1264.82	1251.11	1243.41	1230.26	1219.21	1189.41	1243.16	1266.26
247	Cc1ccc(cc1)C1(C)CCCC1(C)C	1518	*	*	+	+	+	-	*	+	+	*	43.1906	52.5605	59.3625	84.9062	61.386	49.8927	60.2123	55.1432	48.302	66.1078	1467.37	1509.65	1504.52	1548.76	1516.41	1460.8	1507.11	1474.3	1461.12	1555.91
248	Cc1ccc2c(c1)c(ccc2C)C(C)C	1705	+	+	*	-	+	#	*	+	*	-	61.5004	56.1398	62.9818	84.7426	69.6467	56.9669	65.6014	58.466	50.3276	67.2297	1609.48	1604.17	1577.04	1546.03	1704.21	1630.25	1632.35	1560.68	1512.94	1580.44
249	Cc1cccc(c1)C(C)C	1090	+	#	+	*	*	-	*	-	+	-	56.8243	36.1396	39.8857	61.0288	45.0709	35.27	41.9798	40.6003	34.2044	46.1298	1073.72	1075.98	1114.25	1150.85	1145.48	1110.56	1083.42	1096.24	1100.41	1119.13
250	Cc1ccccc1C(C)(C)C	1207	+	-	#	*	*	*	+	+	+	*	53.945	39.7881	41.644	64.5444	45.7093	36.5479	44.6995	42.9708	36.3386	50.0353	1177.09	1172.34	1149.49	1209.44	1160	1141.17	1146.62	1157.86	1155.02	1204.51
251	O=C1C2(C)CCC(C1(C)C)C2	1106	*	-	*	-	+	+	#	+	*	*	52.9585	40.816	40.814	57.2666	44.4906	35.9643	40.5936	43.9981	37.5993	45.1688	1083.29	1199.48	1132.85	1088.16	1132.29	1127.19	1051.21	1184.56	1187.28	1098.11
252	O=C1C2CC(C1C)C(C2)(C)C	1180	+	*	*	*	+	+	-	+	*	*	37.6726	39.1265	41.9681	57.926	45.0567	36.2796	43.3753	42.7359	36.0611	46.5992	1108.68	1154.86	1155.98	1099.15	1145.16	1134.74	1115.85	1151.75	1147.92	1129.39
253	O=C1C=C(C)C(=C)C(C1)(C)C	1242	*	*	-	*	-	-	#	-	+	*	36.0349	42.6142	44.8226	64.6728	47.5033	41.9828	45.9686	47.2511	38.2739	47.2174	1214.35	1246.97	1213.18	1211.58	1200.78	1271.35	1176.12	1269.13	1204.54	1142.9
254	O=C1C=C(CCC1C)C(C)C	1277	+	+	+	#	*	*	+	#	#	+	35.5564	41.2951	44.0126	61.1371	46.9317	41.8912	48.9918	46.7	41.0228	50.861	1243.57	1212.14	1196.95	1152.66	1187.79	1269.15	1246.37	1254.8	1274.87	1222.56
255	O=C1CC(=C2C(C1)(C)CCC(C2)C(=C)C)C	1790	+	+	+	-	-	-	*	+	+	-	39.2482	57.7485	67.0064	87.4637	65.4411	57.9111	64.7026	64.1115	55.2482	70.9802	1676.71	1646.66	1657.68	1591.38	1608.6	1652.86	1611.46	1707.44	1638.84	1662.44
256	O=C1CC2(C(C1C)C2)C(C)C	1123.5	*	-	+	-	-	#	*	*	*	-	48.9766	38.0935	42.5046	60.087	47.0562	37.6651	44.9858	45.1493	38.3475	43.351	1157.95	1127.58	1166.73	1135.16	1190.62	1167.93	1153.28	1214.49	1206.42	1058.37
257	O=C1CC2C(C1(C)CC2)(C)C	1166	-	+	#	+	-	#	#	#	*	-	64.3106	40.0996	40.0957	61.1124	45.6181	36.1794	44.9618	43.9486	36.0252	46.4899	1132.06	1180.56	1118.46	1152.25	1157.92	1132.34	1152.72	1183.28	1147	1127
258	O=C1CCC2(C1C2)C(C)C	1179	*	+	+	+	+	*	*	*	-	*	47.568	35.235	39.1998	54.4916	42.6072	34.3379	40.7482	40.0911	34.9476	40.1758	1032.9	1052.09	1100.51	1041.91	1089.47	1088.24	1054.8	1083	1119.43	988.948
259	O=C1CCCc2c1cc(cc2)C(C)(C)C	1400	+	+	-	#	#	+	-	#	+	#	36.6694	54.681	62.3367	82.3137	63.618	55.7578	62.7052	61.1173	52.1081	63.6223	1584.94	1565.65	1564.11	1505.55	1567.15	1601.28	1565.04	1629.6	1558.5	1501.57
260	O=C1OCC(C1)CC(=C)C(C)C	1195	*	+	-	#	*	#	-	*	-	-	40.8866	41.9366	42.6863	65.2187	46.959	40.7395	45.416	45.976	39.9184	47.3178	1161.59	1229.08	1170.37	1220.67	1188.41	1241.57	1163.27	1235.98	1246.61	1145.1
261	O=CC1=C(C)C=CCC1(C)C	1218	+	+	*	-	+	*	*	-	+	#	42.4429	41.0296	42.0736	62.9808	46.4236	37.8544	44.5391	45.0548	34.9712	46.1923	1186.75	1205.12	1158.09	1183.38	1176.24	1172.46	1142.9	1212.03	1120.03	1120.49
262	O=CC1=C(C)CCC1C(=C)C	1271	#	+	*	*	*	+	*	-	*	*	48.2406	42.1045	41.7179	60.5868	48.0575	38.8274	45.9997	45.9507	35.9414	49.4908	1247.16	1233.51	1150.97	1143.49	1213.38	1195.77	1176.84	1235.33	1144.86	1192.61
263	O=CC1=CC=C(CC1)C(C)C	1282	#	*	#	+	-	*	*	-	-	+	46.6694	40.8068	42.2144	63.253	46.7841	40.202	44.9104	46.8579	36.3337	46.8746	1202.91	1199.24	1160.91	1187.92	1184.43	1228.69	1151.53	1258.91	1154.89	1135.41
264	O=CC1=CCC2CC1C2(C)C	1216	-	*	*	+	-	*	+	+	#	*	41.5044	39.9465	40.4274	60.6807	47.859	36.7924	44.807	44.9398	36.8143	46.1037	1183.1	1176.52	1125.11	1145.05	1208.87	1147.03	1149.12	1209.05	1167.19	1118.55
266	O=CCC1CC=C(C1(C)C)C	1141	+	#	*	*	+	#	+	#	*	*	46.2766	40.8688	45.0189	62.7077	43.599	39.0148	48.7028	45.241	35.7611	47.1883	1143.96	1200.88	1217.11	1178.83	1112.02	1200.26	1239.65	1216.88	1140.24	1142.27
267	O=Cc1ccc(c(c1C)C)C	1312	*	*	-	+	+	+	+	+	+	-	56.6667	42.6257	45.8168	64.5902	53.9834	42.4785	50.4898	48.0414	39.3522	52.886	1298.24	1247.28	1233.1	1210.2	1348.11	1283.22	1281.18	1289.68	1232.13	1266.84
268	O=Cc1ccc(cc1)C(C)C	1265	-	+	-	-	#	*	-	+	-	#	41.0488	40.3441	42.1444	64.55	48.4238	39.552	46.8534	47.6873	38.9675	48.5694	1196.91	1187.02	1159.51	1209.53	1221.71	1213.12	1196.68	1280.47	1222.28	1172.46
269	O=Cc1ccccc1	981	#	+	*	#	*	-	*	#	-	*	46.3782	33.7511	26.2683	49.3897	38.117	30.0626	38.0357	38.3929	33.587	37.8052	1010.1	1012.9	841.397	956.893	987.388	985.834	991.769	1038.85	1084.62	937.12
270	OC1CC2(C(C1C)C2)C(C)C	1055	#	#	*	+	*	+	+	+	-	*	44.0844	39.2811	44.6626	62.3316	47.0307	39.4925	45.4198	41.5071	38.81	46.2036	1180.19	1158.95	1209.97	1172.56	1190.04	1211.7	1163.36	1119.81	1218.25	1120.74
271	OC1CC2C(C1(C)CC2)(C)C	1181	-	-	+	#	-	-	*	*	-	#	38.9998	41.2221	39.9214	61.3533	45.0397	38.5519	45.331	40.9082	35.9326	46.7616	1126.38	1210.21	1114.97	1156.26	1144.78	1189.17	1161.3	1104.24	1144.63	1132.94
272	OC1CCC(C(C1)C)C	1126	#	+	-	*	+	*	+	#	-	#	44.2328	36.5923	35.3664	54.8783	40.1703	33.892	39.1999	35.6016	31.9041	39.0514	1021.22	1087.94	1023.7	1048.36	1034.07	1077.55	1018.82	966.286	1041.56	964.366
273	OCC(=CCCC=C(C)C)C	1383	-	-	#	-	+	#	-	#	-	-	49.7894	40.16	43.2112	62.5755	46.8002	41.9817	46.7092	46.6729	37.1585	46.6044	1094.22	1182.16	1180.89	1176.63	1184.8	1271.32	1193.33	1254.1	1176	1129.5
