# Supplementary material for: A simple and reliable QSPR model for prediction of chromatography retention indices of volatile organic compounds in peppers
Source: Royal Society of Chemistry journal article supplement (doi:10.1039/d3ra07960k), 2024-01-01
Supplement: d3ra07960k2.pdf [file d3ra07960k2.pdf]

Table S 2. Statistical qualities of the developed models for RI of VOCs of pepper.

| Split   | Target Function | Set      | n      | R <sup>2</sup> | CCC    | IIC    | CII    | Q2     | Q <sup>2</sup> <sub>1</sub> | Q <sup>2</sup> <sub>2</sub> | Q <sup>2</sup> <sub>3</sub> | RMSE     | MAE     | F      | Avr. Rm <sup>2</sup> | ΔRm <sup>2</sup> | Y-Test                                                                     | QSAR Model                                                            |
|---------|-----------------|----------|--------|----------------|--------|--------|--------|--------|-----------------------------|-----------------------------|-----------------------------|----------|---------|--------|----------------------|------------------|----------------------------------------------------------------------------|-----------------------------------------------------------------------|
| Split 1 | TF0             | ActivTRN | 72     | 0.9920         | 0.9960 | 0.8172 | 0.9944 | 0.9916 |                             |                             |                             | 18.7     | 12.6    | 8581   |                      |                  |                                                                            | RI = -52.4339712 (± 1.3757417) + 29.7705884 (± 0.0303760) * DCW(1,15) |
|         |                 | Pass TRN | 58     | 0.9926         | 0.9831 | 0.3052 | 0.9950 | 0.9921 |                             |                             |                             | 37.2     | 32.3    | 7377   |                      |                  |                                                                            |                                                                       |
|         |                 | Calib    | 53     | 0.8265         | 0.9073 | 0.8281 | 0.9071 | 0.8122 | 0.8149                      | 0.8134                      | 0.8459                      | 81.7     | 63.5    | 238    | 0.7521               | 0.0224           | 0.0121                                                                     |                                                                       |
|         |                 | Valid    | 90     | 0.7989         | 0.8841 | 0.8778 | 0.8968 | 0.7904 |                             |                             |                             | 103.629  | 82.1056 |        | 0.6832               | 0.1839           | 0.0121                                                                     |                                                                       |
|         | TF1             | ActivTRN | 72     | 0.9046         | 0.9499 | 0.8740 | 0.9465 | 0.8980 |                             |                             |                             | 64.500   | 50.500  | 654    |                      |                  |                                                                            | RI = -5.2108455(± 6.8478620) + 20.8138387(± 0.1142852) * DCW(1,15)    |
|         |                 | Pass TRN | 58     | 0.9028         | 0.9327 | 0.4892 | 0.9394 | 0.8957 |                             |                             |                             | 74.100   | 57.000  | 511    |                      |                  |                                                                            |                                                                       |
|         |                 | Calib    | 53     | 0.8567         | 0.8567 | 0.9256 | 0.9151 | 0.8461 | 0.8481                      | 0.8400                      | 0.8735                      | 74.000   | 57.900  | 299    | 0.7936               | 0.0140           |                                                                            |                                                                       |
|         |                 | Valid    | 90     | 0.8721         | 0.9269 | 0.5610 | 0.9298 | 0.8661 |                             |                             |                             | 79.339   | 60.190  | 600    | 0.8002               | 0.1198           | 0.0120                                                                     |                                                                       |
|         | TF2             | ActivTRN | 72     | 0.9869         | 0.9934 | 0.8151 | 0.9913 | 0.9861 |                             |                             |                             | 23.900   | 17.000  | 5187   |                      |                  |                                                                            | RI = -76.5203970 (± 2.3000614) + 22.7374279(± 0.0373108) * DCW(1,15)  |
|         |                 | Pass TRN | 58     | 0.9870         | 0.9873 | 0.4293 | 0.9918 | 0.9859 |                             |                             |                             | 32.600   | 25.900  | 4189   |                      |                  |                                                                            |                                                                       |
|         |                 | Calib    | 53     | 0.9353         | 0.9644 | 0.7763 | 0.9786 | 0.9290 | 0.9291                      | 0.9200                      | 0.9410                      | 50.600   | 42.800  | 723    | 0.9049               | 0.0201           |                                                                            |                                                                       |
|         |                 | Valid    | 90     | 0.8331         | 0.9042 | 0.8591 | 0.9101 | 0.8238 |                             |                             |                             | 93.619   | 71.035  | 439    | 0.7219               | 0.1581           | 0.0119                                                                     |                                                                       |
| TF3     | ActivTRN        | 72       | 0.9078 | 0.9517         | 0.8755 | 0.9420 | 0.9004 |        |                             |                             | 63.400                      | 46.600   | 679     |        |                      |                  | RI = 73.8025760<br>(± 7.0843723) + 24.5924178<br>(± 0.1499445) * DCW(1,15) |                                                                       |
|         | Pass TRN        | 58       | 0.9007 | 0.9320         | 0.6353 | 0.9353 | 0.8942 |        |                             |                             | 73.100                      | 54.900   | 499     |        |                      |                  |                                                                            |                                                                       |
|         | Calib           | 53       | 0.9142 | 0.9536         | 0.9561 | 0.9499 | 0.9068 | 0.9142 | 0.9100                      | 0.9285                      | 55.700                      | 45.100   | 533     | 0.8505 | 0.0838               |                  |                                                                            |                                                                       |
|         | Valid           | 90       | 0.9018 | 0.9466         | 0.7578 | 0.9429 | 0.8974 |        |                             |                             | 65.890                      | 51.371   | 808     | 0.8566 | 0.0481               | 0.0116           |                                                                            |                                                                       |
| Split 2 | TF0             | ActivTRN | 69     | 0.9919         | 0.9960 | 0.8853 | 0.9935 | 0.9915 |                             |                             |                             | 18.5     | 11.6    | 8116   |                      |                  |                                                                            | RI = -51.3879206 (± 1.7417654) + 27.3594255 (± 0.0318961) * DCW(1,40) |
|         |                 | Pass TRN | 58     | 0.9928         | 0.9882 | 0.3473 | 0.9957 | 0.9922 |                             |                             |                             | 31.1     | 25.9    | 7556   |                      |                  |                                                                            |                                                                       |
|         |                 | Calib    | 56     | 0.6932         | 0.8288 | 0.7010 | 0.8529 | 0.6687 | 0.6643                      | 0.6304                      | 0.6655                      | 117.3    | 88.9    | 120    | 0.5763               | 0.1120           |                                                                            |                                                                       |
|         |                 | Valid    | 90     | 0.7889         | 0.8735 | 0.8208 | 0.8922 | 0.7775 |                             |                             |                             | 110.9486 | 84.4108 |        | 0.6726               | 0.1908           | 0.0131                                                                     |                                                                       |
|         | TF1             | ActivTRN | 69     | 0.8728         | 0.9321 | 0.8304 | 0.9253 | 0.8648 |                             |                             |                             | 73.400   | 58.700  | 453    |                      |                  |                                                                            | RI = 97.7505664(± 7.2574638) + 25.5740606 (± 0.1520381) * DCW(1,40)   |
|         |                 | Pass TRN | 58     | 0.9083         | 0.9463 | 0.8718 | 0.9347 | 0.9022 |                             |                             |                             | 61.800   | 47.800  | 545    |                      |                  |                                                                            |                                                                       |
|         |                 | Calib    | 56     | 0.8767         | 0.9253 | 0.9363 | 0.9418 | 0.8652 | 0.8817                      | 0.8698                      | 0.8822                      | 69.600   | 52.000  | 377    | 0.7417               | 0.1311           |                                                                            |                                                                       |
|         |                 | Valid    | 90     | 0.8769         | 0.9250 | 0.9043 | 0.9248 | 0.8709 |                             |                             |                             | 77.719   | 61.449  | 627    | 0.8209               | 0.0776           | 0.0129                                                                     |                                                                       |
| TF2     | ActivTRN        | 69       | 0.9672 | 0.9833         | 0.8742 | 0.9785 | 0.9651 |        |                             |                             | 37.300                      | 25.100   | 1948    |        |                      |                  | RI = 38.5630305(± 3.9117811) + 25.5367202 (± 0.0739555) * DCW(1,40)        |                                                                       |
|         | Pass TRN        | 58       | 0.9772 | 0.9877         | 0.9426 | 0.9870 | 0.9756 |        |                             |                             | 30.500                      | 23.500   | 2362    |        |                      |                  |                                                                            |                                                                       |

|         |          |          |        |        |        |        |        |        |        |        |        |         |         |         |        |        |        |                                                                                       |        |
|---------|----------|----------|--------|--------|--------|--------|--------|--------|--------|--------|--------|---------|---------|---------|--------|--------|--------|---------------------------------------------------------------------------------------|--------|
| Split 3 |          | Calib    | 56     | 0.9011 | 0.9343 | 0.7565 | 0.9765 | 0.8895 | 0.8986 | 0.8884 | 0.8990 | 64.500  | 47.300  | 483     | 0.7407 | 0.1187 |        | $RI = 121.5622042$<br>$(\pm 6.8196492) + 26.4092762$<br>$(\pm 0.1507222) * DCW(1,40)$ |        |
|         |          | Valid    | 90     | 0.8655 | 0.9300 | 0.7534 | 0.9145 | 0.8585 |        |        |        |         | 74.644  | 54.419  | 566    | 0.8057 | 0.0388 |                                                                                       | 0.0128 |
|         | TF3      | ActivTRN | 69     | 0.8971 | 0.9458 | 0.7936 | 0.9417 | 0.8901 |        |        |        |         | 66.000  | 53.800  | 576    |        |        |                                                                                       |        |
|         |          | Pass TRN | 58     | 0.9062 | 0.9430 | 0.5816 | 0.9358 | 0.9004 |        |        |        |         | 64.000  | 46.300  | 531    |        |        |                                                                                       |        |
|         |          | Calib    | 56     | 0.8971 | 0.9422 | 0.9472 | 0.9494 | 0.8878 | 0.9046 | 0.8950 | 0.9050 |         | 62.500  | 50.600  | 462    | 0.8051 | 0.1032 |                                                                                       |        |
|         |          | Valid    | 90     | 0.8981 | 0.9459 | 0.6661 | 0.9375 | 0.8939 |        |        |        |         | 66.523  | 51.741  | 776    | 0.8517 | 0.0085 |                                                                                       | 0.0130 |
|         | TF0      | ActivTRN | 67     | 0.9898 | 0.9949 | 0.8291 | 0.9928 | 0.9892 |        |        |        |         | 19.4    | 13.4    | 6236   |        |        |                                                                                       |        |
|         |          | Pass TRN | 60     | 0.9921 | 0.9951 | 0.7225 | 0.9936 | 0.9915 |        |        |        |         | 21.2    | 16.0    | 7127   |        |        |                                                                                       |        |
|         |          | Calib    | 56     | 0.7871 | 0.8725 | 0.6665 | 0.8756 | 0.7682 | 0.7008 | 0.6930 | 0.7284 |         | 106.6   | 75.3    | 196    | 0.6464 | 0.2000 |                                                                                       |        |
|         |          | Valid    | 90     | 0.8401 | 0.9043 | 0.8485 | 0.9198 | 0.8323 |        |        |        |         | 96.5653 | 73.0709 |        | 0.7018 | 0.1605 |                                                                                       | 0.0133 |
| TF1     | ActivTRN | 67       | 0.8724 | 0.9318 | 0.7783 | 0.9310 | 0.8630 |        |        |        |        | 68.800  | 55.500  | 437     |        |        |        |                                                                                       |        |
|         | Pass TRN | 60       | 0.8593 | 0.9145 | 0.7194 | 0.9151 | 0.8487 |        |        |        |        | 83.700  | 65.000  | 348     |        |        |        |                                                                                       |        |
|         | Calib    | 56       | 0.8528 | 0.9208 | 0.9235 | 0.9093 | 0.8424 | 0.8557 | 0.8520 | 0.8690 |        | 74.000  | 57.200  | 307     | 0.7859 | 0.1264 |        |                                                                                       |        |
|         | Valid    | 90       | 0.8813 | 0.9333 | 0.8771 | 0.9288 | 0.8752 |        |        |        |        | 70.393  | 55.263  | 653     | 0.7940 | 0.1153 | 0.0129 |                                                                                       |        |
| TF2     | ActivTRN | 67       | 0.9756 | 0.9877 | 0.9296 | 0.9810 | 0.9740 |        |        |        |        | 30.100  | 18.600  | 2563    |        |        |        |                                                                                       |        |
|         | Pass TRN | 60       | 0.9882 | 0.9904 | 0.7190 | 0.9921 | 0.9873 |        |        |        |        | 28.800  | 21.900  | 4788    |        |        |        |                                                                                       |        |
|         | Calib    | 56       | 0.9185 | 0.9546 | 0.7617 | 0.9676 | 0.9115 | 0.9058 | 0.9033 | 0.9145 |        | 59.800  | 47.500  | 597     | 0.8554 | 0.0798 |        |                                                                                       |        |
|         | Valid    | 90       | 0.8508 | 0.9153 | 0.8737 | 0.9076 | 0.8450 |        |        |        |        | 86.193  | 63.673  | 502     | 0.7832 | 0.1304 | 0.0140 |                                                                                       |        |
| TF3     | ActivTRN | 67       | 0.8924 | 0.9431 | 0.8367 | 0.9399 | 0.8844 |        |        |        |        | 63.200  | 48.400  | 531     |        |        |        |                                                                                       |        |
|         | Pass TRN | 60       | 0.8608 | 0.9174 | 0.9040 | 0.9163 | 0.8504 |        |        |        |        | 82.500  | 62.500  | 352     |        |        |        |                                                                                       |        |
|         | Calib    | 56       | 0.8844 | 0.9379 | 0.9404 | 0.9271 | 0.8770 | 0.8867 | 0.8838 | 0.8972 |        | 65.600  | 50.300  | 405     | 0.8268 | 0.1080 |        |                                                                                       |        |
|         | Valid    | 90       | 0.9011 | 0.9448 | 0.8764 | 0.9454 | 0.8960 |        |        |        |        | 64.539  | 51.674  | 802     | 0.8294 | 0.0960 | 0.0140 |                                                                                       |        |
| Split 4 | TF0      | ActivTRN | 71     | 0.9881 | 0.9940 | 0.7031 | 0.9911 | 0.9875 |        |        |        |         | 21.8    | 15.4    | 5648   |        |        |                                                                                       |        |
|         |          | Pass TRN | 61     | 0.9882 | 0.9882 | 0.7872 | 0.9918 | 0.9874 |        |        |        |         | 33.5    | 25.4    | 4839   |        |        |                                                                                       |        |
|         |          | Calib    | 50     | 0.7428 | 0.8405 | 0.6521 | 0.8520 | 0.7046 | 0.5931 | 0.5906 | 0.7068 |         | 116.3   | 79.3    | 136    | 0.5750 | 0.2399 |                                                                                       |        |
|         |          | Valid    | 91     | 0.8436 | 0.9125 | 0.6479 | 0.9176 | 0.8372 |        |        |        |         | 84.8959 | 65.6215 |        | 0.7543 | 0.1452 | 0.0130                                                                                |        |
|         | TF1      | ActivTRN | 71     | 0.8255 | 0.9044 | 0.8581 | 0.9024 | 0.8140 |        |        |        |         | 83.600  | 68.800  | 322    |        |        |                                                                                       |        |
|         |          | Pass TRN | 61     | 0.8721 | 0.8991 | 0.6056 | 0.9220 | 0.8632 |        |        |        |         | 93.800  | 76.100  | 395    |        |        |                                                                                       |        |
|         |          | Calib    | 50     | 0.8767 | 0.9357 | 0.9363 | 0.9298 | 0.8652 | 0.8693 | 0.8685 | 0.9058 |         | 65.900  | 52.800  | 334    | 0.8211 | 0.0445 |                                                                                       |        |
|         |          | Valid    | 91     | 0.8988 | 0.9465 | 0.9279 | 0.9451 | 0.8944 |        |        |        |         | 61.313  | 49.086  | 791    | 0.8509 | 0.0949 | 0.0138                                                                                |        |
| TF0     | ActivTRN | 71       | 0.9881 | 0.9940 | 0.7031 | 0.9911 | 0.9875 |        |        |        |        | 21.8    | 15.4    | 5648    |        |        |        |                                                                                       |        |
|         | Pass TRN | 61       | 0.9882 | 0.9882 | 0.7872 | 0.9918 | 0.9874 |        |        |        |        | 33.5    | 25.4    | 4839    |        |        |        |                                                                                       |        |
|         | Calib    | 50       | 0.7428 | 0.8405 | 0.6521 | 0.8520 | 0.7046 | 0.5931 | 0.5906 | 0.7068 |        | 116.3   | 79.3    | 136     | 0.5750 | 0.2399 |        |                                                                                       |        |
|         | Valid    | 91       | 0.8436 | 0.9125 | 0.6479 | 0.9176 | 0.8372 |        |        |        |        | 84.8959 | 65.6215 |         | 0.7543 | 0.1452 | 0.0130 |                                                                                       |        |
| TF1     | ActivTRN | 71       | 0.8255 | 0.9044 | 0.8581 | 0.9024 | 0.8140 |        |        |        |        | 83.600  | 68.800  | 322     |        |        |        |                                                                                       |        |
|         | Pass TRN | 61       | 0.8721 | 0.8991 | 0.6056 | 0.9220 | 0.8632 |        |        |        |        | 93.800  | 76.100  | 395     |        |        |        |                                                                                       |        |
|         | Calib    | 50       | 0.8767 | 0.9357 | 0.9363 | 0.9298 | 0.8652 | 0.8693 | 0.8685 | 0.9058 |        | 65.900  | 52.800  | 334     | 0.8211 | 0.0445 |        |                                                                                       |        |
|         | Valid    | 91       | 0.8988 | 0.9465 | 0.9279 | 0.9451 | 0.8944 |        |        |        |        | 61.313  | 49.086  | 791     | 0.8509 | 0.0949 | 0.0138 |                                                                                       |        |

|         |          |          |          |        |        |        |        |        |        |        |        |         |         |         |        |        |                                                                             |                                                                             |                                                                       |
|---------|----------|----------|----------|--------|--------|--------|--------|--------|--------|--------|--------|---------|---------|---------|--------|--------|-----------------------------------------------------------------------------|-----------------------------------------------------------------------------|-----------------------------------------------------------------------|
| Split 5 | TF2      | ActivTRN | 71       | 0.9748 | 0.9872 | 0.7848 | 0.9811 | 0.9735 |        |        |        | 31.800  | 21.100  | 2628    |        |        |                                                                             | IR= -44.8038667<br>(± 2.9827910) + -29.6029793<br>(± 0.0611781) * DCW(1,15) |                                                                       |
|         |          | Pass TRN | 61       | 0.9795 | 0.9817 | 0.8641 | 0.9867 | 0.9777 |        |        |        | 41.300  | 32.800  | 2765    |        |        |                                                                             |                                                                             |                                                                       |
|         |          | Calib    | 50       | 0.9430 | 0.9617 | 0.4586 | 0.9846 | 0.9368 | 0.9207 | 0.9202 | 0.9429 | 51.300  | 41.500  | 777     | 0.8963 | 0.0563 |                                                                             |                                                                             |                                                                       |
|         |          | Valid    | 91       | 0.8681 | 0.9278 | 0.6876 | 0.9318 | 0.8613 |        |        |        | 76.113  | 58.125  | 586     | 0.7972 | 0.1228 | 0.0131                                                                      |                                                                             |                                                                       |
|         | TF3      | ActivTRN | 71       | 0.8298 | 0.9070 | 0.6443 | 0.9078 | 0.8182 |        |        |        | 82.500  | 65.700  | 332     |        |        |                                                                             | RI = 133.8434683<br>(± 9.0780433) + 16.6644164<br>(± 0.1272428) * DCW(1,15) |                                                                       |
|         |          | Pass TRN | 61       | 0.8702 | 0.8977 | 0.8039 | 0.9296 | 0.8616 |        |        |        | 93.400  | 70.900  | 389     |        |        |                                                                             |                                                                             |                                                                       |
|         |          | Calib    | 50       | 0.9063 | 0.9519 | 0.9520 | 0.9453 | 0.8978 | 0.9034 | 0.9028 | 0.9304 | 56.700  | 45.800  | 455     | 0.8632 | 0.0188 |                                                                             |                                                                             |                                                                       |
|         |          | Valid    | 91       | 0.9130 | 0.9546 | 0.8095 | 0.9550 | 0.9075 |        |        |        | 56.899  | 45.225  | 934     | 0.8719 | 0.0791 | 0.0134                                                                      |                                                                             |                                                                       |
|         | Split 5  | TF0      | ActivTRN | 70     | 0.9890 | 0.9945 | 0.9661 | 0.9921 | 0.9884 |        |        |         | 19.9    | 13.3    | 6020   |        |                                                                             |                                                                             | RI = -42.7183126 (± 2.0784123) + 29.6027624 (± 0.0428270) * DCW(1,15) |
|         |          |          | Pass TRN | 59     | 0.9886 | 0.9935 | 0.9598 | 0.9918 | 0.9878 |        |        |         | 24.0    | 18.7    | 4852   |        |                                                                             |                                                                             |                                                                       |
|         |          |          | Calib    | 54     | 0.7925 | 0.8900 | 0.7790 | 0.8903 | 0.7755 | 0.7776 | 0.7759 | 0.7909  | 91.9    | 70.3    | 195    | 0.7063 | 0.0263                                                                      |                                                                             |                                                                       |
|         |          |          | Valid    | 89     | 0.8265 | 0.9058 | 0.6187 | 0.9055 | 0.8116 |        |        |         | 91.2434 | 66.9158 |        | 0.7519 | 0.0590                                                                      | 0.0131                                                                      |                                                                       |
| TF1     |          | ActivTRN | 70       | 0.8983 | 0.9464 | 0.7732 | 0.9440 | 0.8916 |        |        |        | 60.400  | 46.300  | 591     |        |        |                                                                             | RI = 59.0316394<br>(± 6.6548615) + 17.9445111<br>(± 0.0981398) * DCW(1,15)  |                                                                       |
|         |          | Pass TRN | 59       | 0.9172 | 0.9555 | 0.5849 | 0.9520 | 0.9105 |        |        |        | 61.100  | 47.300  | 620     |        |        |                                                                             |                                                                             |                                                                       |
|         |          | Calib    | 54       | 0.8791 | 0.9346 | 0.9376 | 0.9263 | 0.8665 | 0.8606 | 0.8595 | 0.8689 | 72.800  | 50.400  | 371     | 0.8232 | 0.1066 |                                                                             |                                                                             |                                                                       |
|         |          | Valid    | 89       | 0.8919 | 0.9439 | 0.8158 | 0.9309 | 0.8878 |        |        |        | 68.846  | 56.323  | 718     | 0.8429 | 0.0001 | 0.0129                                                                      |                                                                             |                                                                       |
| TF2     |          | ActivTRN | 70       | 0.9830 | 0.9914 | 0.9631 | 0.9880 | 0.9820 |        |        |        | 24.700  | 16.200  | 3877    |        |        |                                                                             | RI = 54.1892304<br>(± 2.6086325) + 21.3745917<br>(± 0.0415752) * DCW(1,15)  |                                                                       |
|         |          | Pass TRN | 59       | 0.9830 | 0.9892 | 0.6596 | 0.9897 | 0.9817 |        |        |        | 31.100  | 24.700  | 3233    |        |        |                                                                             |                                                                             |                                                                       |
|         |          | Calib    | 54       | 0.9221 | 0.9563 | 0.7343 | 0.9682 | 0.9148 | 0.9052 | 0.9045 | 0.9109 | 60.000  | 46.800  | 604     | 0.8502 | 0.0780 |                                                                             |                                                                             |                                                                       |
|         |          | Valid    | 89       | 0.8694 | 0.9297 | 0.7792 | 0.9226 | 0.8619 |        |        |        | 78.834  | 58.496  | 597     | 0.8108 | 0.0672 | 0.0128                                                                      |                                                                             |                                                                       |
| TF3     | ActivTRN | 70       | 0.8883   | 0.9408 | 0.9156 | 0.9333 | 0.8820 |        |        |        | 63.300 | 48.100  | 533     |         |        |        | RI = 120.8000514<br>(± 5.6910705) + 22.7349178<br>(± 0.1122086) * DCW(1,15) |                                                                             |                                                                       |
|         | Pass TRN | 90       | 0.9167   | 0.9433 | 0.7195 | 0.9538 | 0.9106 |        |        |        | 66.200 | 50.800  | 621     |         |        |        |                                                                             |                                                                             |                                                                       |
|         | Calib    | 54       | 0.9025   | 0.9492 | 0.9500 | 0.9446 | 0.8937 | 0.9025 | 0.9018 | 0.9084 | 60.900 | 44.900  | 472     | 0.8572  | 0.0690 |        |                                                                             |                                                                             |                                                                       |
|         | Valid    | 89       | 0.9259   | 0.9594 | 0.7842 | 0.9491 | 0.9226 |        |        |        | 56.277 | 43.558  | 1087    | 0.8551  | 0.0745 | 0.0117 |                                                                             |                                                                             |                                                                       |
| Split 6 | TF0      | ActivTRN | 69       | 0.9841 | 0.9920 | 0.7832 | 0.9895 | 0.9831 |        |        |        | 23.3    | 16.9    | 4098    |        |        |                                                                             | RI = 96.3851217 (± 2.5974978) + 20.3785443 (± 0.0413424) * DCW(1,15)        |                                                                       |
|         |          | Pass TRN | 59       | 0.9850 | 0.9808 | 0.6867 | 0.9897 | 0.9839 |        |        |        | 40.3    | 31.8    | 3670    |        |        |                                                                             |                                                                             |                                                                       |
|         |          | Calib    | 55       | 0.6823 | 0.8200 | 0.6787 | 0.8204 | 0.6557 | 0.6854 | 0.6737 | 0.6664 | 116.7   | 83.6    | 112     | 0.5618 | 0.1306 |                                                                             |                                                                             |                                                                       |
|         |          | Valid    | 90       | 0.8251 | 0.9078 | 0.8108 | 0.9020 | 0.8172 |        |        |        | 86.9461 | 66.3217 |         | 0.7499 | 0.0541 | 0.0108                                                                      |                                                                             |                                                                       |
|         | TF1      | ActivTRN | 69       | 0.8914 | 0.9426 | 0.7910 | 0.9254 | 0.8849 |        |        |        | 60.900  | 43.500  | 542     |        |        |                                                                             | RI = 273.1851178<br>(± 5.3708235) + 19.0669711<br>(± 0.0999808) * DCW(1,15) |                                                                       |
|         |          | Pass TRN | 59       | 0.8911 | 0.9334 | 0.8092 | 0.9462 | 0.8828 |        |        |        | 74.900  | 62.300  | 458     |        |        |                                                                             |                                                                             |                                                                       |

|         |          |          |        |        |        |         |        |        |        |        |        |        |          |         |        |        |        |        |  |
|---------|----------|----------|--------|--------|--------|---------|--------|--------|--------|--------|--------|--------|----------|---------|--------|--------|--------|--------|--|
|         |          | Calib    | 55     | 0.8425 | 0.8846 | 0.9178  | 0.9122 | 0.8285 | 0.8243 | 0.8178 | 0.8137 | 87.200 | 65.300   | 278     | 0.6117 | 0.1986 |        |        |  |
|         |          | Valid    | 90     | 0.8744 | 0.9286 | 0.8912  | 0.9249 | 0.8695 |        |        |        |        | 71.751   | 57.170  | 612    | 0.7950 | 0.1195 | 0.0103 |  |
|         | TF2      | ActivTRN | 69     | 0.9721 | 0.9859 | 0.9860  | 0.9833 | 0.9705 |        |        |        |        | 30.900   | 23.800  | 2300   |        |        |        |  |
|         |          | Pass TRN | 59     | 0.9690 | 0.9784 | 0.7394  | 0.9800 | 0.9665 |        |        |        |        | 44.100   | 32.300  | 1749   |        |        |        |  |
|         |          | Calib    | 55     | 0.9148 | 0.9511 | 0.9048  | 0.9776 | 0.9046 | 0.9125 | 0.9093 | 0.9072 |        | 61.500   | 49.200  | 559    | 0.8314 | 0.0863 |        |  |
|         |          | Valid    | 90     | 0.8973 | 0.9472 | 0.7383  | 0.9461 | 0.8929 |        |        |        |        | 64.804   | 52.827  | 769    | 0.8505 | 0.0076 | 0.0101 |  |
|         | TF3      | ActivTRN | 69     | 0.8848 | 0.9389 | 0.6584  | 0.9279 | 0.8768 |        |        |        |        | 62.700   | 48.000  | 507    |        |        |        |  |
|         |          | Pass TRN | 59     | 0.8999 | 0.9428 | 0.6767  | 0.9429 | 0.8922 |        |        |        |        | 70.800   | 54.800  | 504    |        |        |        |  |
|         |          | Calib    | 55     | 0.9038 | 0.9389 | 0.9507  | 0.9440 | 0.8940 | 0.8976 | 0.8938 | 0.8914 |        | 66.600   | 51.900  | 488    | 0.7613 | 0.1103 |        |  |
|         |          | Valid    | 90     | 0.9308 | 0.9588 | 0.7704  | 0.9549 | 0.9281 |        |        |        |        | 54.400   | 43.714  | 1183   | 0.8411 | 0.0734 | 0.0101 |  |
| Split 7 | TF0      | ActivTRN | 68     | 0.9867 | 0.9933 | 0.9082  | 0.9908 | 0.9858 |        |        |        |        | 22.2     | 14.9    | 4825   |        |        |        |  |
|         |          | Pass TRN | 55     | 0.9921 | 0.9937 | 0.6936  | 0.9948 | 0.9914 |        |        |        |        | 22.8     | 18.0    | 6553   |        |        |        |  |
|         |          | Calib    | 56     | 0.7568 | 0.8630 | 0.7233  | 0.8533 | 0.7398 | 0.6966 | 0.6966 | 0.6731 |        | 113.8    | 74.8    | 167    | 0.6578 | 0.1635 |        |  |
|         |          | Valid    | 94     | 0.6551 | 0.8056 | 0.5799  | 0.8036 | 0.6399 |        |        |        |        | 123.6551 | 89.2166 |        | 0.5313 | 0.0466 | 0.0089 |  |
|         | TF1      | ActivTRN | 68     | 0.8536 | 0.9210 | 0.8967  | 0.9098 | 0.8441 |        |        |        |        | 73.600   | 59.200  | 379    |        |        |        |  |
|         |          | Pass TRN | 55     | 0.8580 | 0.9252 | 0.8300  | 0.9163 | 0.8456 |        |        |        |        | 78.200   | 61.000  | 314    |        |        |        |  |
|         |          | Calib    | 56     | 0.8997 | 0.9478 | 0.9485  | 0.9468 | 0.8918 | 0.8988 | 0.8988 | 0.8909 |        | 65.700   | 51.600  | 476    | 0.8537 | 0.0480 |        |  |
|         |          | Valid    | 94     | 0.8862 | 0.9375 | 0.5494  | 0.9408 | 0.8798 |        |        |        |        | 69.245   | 52.153  | 717    | 0.8299 | 0.1062 | 0.0095 |  |
|         | TF2      | ActivTRN | 68     | 0.9759 | 0.9878 | 0.9032  | 0.9833 | 0.9744 |        |        |        |        | 29.900   | 20.600  | 2630   |        |        |        |  |
|         |          | Pass TRN | 55     | 0.9848 | 0.9914 | 0.8260  | 0.9907 | 0.9834 |        |        |        |        | 26.900   | 21.500  | 3363   |        |        |        |  |
|         |          | Calib    | 56     | 0.9632 | 0.9794 | 0.4569  | 0.9837 | 0.9603 | 0.9603 | 0.9591 | 0.9559 |        | 41.800   | 34.000  | 1387   | 0.9455 | 0.0055 |        |  |
|         |          | Valid    | 94     | 0.8166 | 0.8997 | 0.6263  | 0.8938 | 0.8084 |        |        |        |        | 90.680   | 66.756  | 410    | 0.7389 | 0.0118 | 0.0091 |  |
| TF3     | ActivTRN | 68       | 0.8753 | 0.9335 | 0.9080 | 0.9274  | 0.8672 |        |        |        |        | 67.900 | 52.500   | 456     |        |        |        |        |  |
|         | Pass TRN | 55       | 0.8781 | 0.9313 | 0.7067 | 0.9248  | 0.8691 |        |        |        |        | 75.000 | 58.700   | 375     |        |        |        |        |  |
|         | Calib    | 56       | 0.9481 | 0.9723 | 0.9737 | 0.9690  | 0.9444 | 0.9447 | 0.9447 | 0.9404 |        | 48.600 | 35.700   | 969     | 0.9235 | 0.0100 |        |        |  |
|         | Valid    | 94       | 0.9024 | 0.9430 | 0.7120 | 0.9440  | 0.8973 |        |        |        |        | 67.113 | 49.822   | 850     | 0.8573 | 0.0534 | 0.0094 |        |  |
| Split 8 | TF0      | ActivTRN | 72     | 0.9900 | 0.9950 | 0.6479  | 0.9928 | 0.9894 |        |        |        |        | 21.1     | 6815    |        |        |        |        |  |
|         |          | Pass TRN | 56     | 0.9958 | 0.9949 | 0.48457 | 0.9970 | 0.9955 |        |        |        |        | 19.1     | 12482   |        |        |        |        |  |
|         |          | Calib    | 55     | 0.7229 | 0.8461 | 0.5113  | 0.8336 | 0.6831 | 0.6945 | 0.6924 | 0.7075 |        | 0.6159   | 111.2   | 136    | 0.6159 | 0.0134 |        |  |
|         |          | Valid    | 90     | 0.7790 | 0.8702 | 0.5389  | 0.8773 | 0.7685 |        |        |        |        | 107.4846 | 75.1572 | 6.6595 | 0.1986 | 0.0102 |        |  |

$$RI = 129.5643972$$

$$(\pm 3.0795507) + 25.2822707$$

$$(\pm 0.0628972) * DCW(1,15)$$

$$RI = 265.7739113$$

$$(\pm 6.3218876) + 23.9519988$$

$$(\pm 0.1477068) * DCW(1,15)$$

$$RI = -32.8955202 (\pm 2.8091219) + 29.3656687 (\pm 0.0588429) * DCW(1,15)$$

$$RI = 176.6226150$$

$$(\pm 7.5802538) + 20.1221801$$

$$(\pm 0.1340752) * DCW(1,15)$$

$$RI = 107.2979501$$

$$(\pm 3.1266672) + 25.9872654$$

$$(\pm 0.0633049) * DCW(1,15)$$

$$RI = 107.8893746$$

$$(\pm 7.4311015) + 23.2381794$$

$$(\pm 0.1417217) * DCW(1,15)$$

$$RI = -50.4421491 (\pm 2.0384396) + 30.0319106 (\pm 0.0410919) * DCW(1,20)$$

|          |          |          |        |        |        |        |        |        |        |        |         |          |         |        |        |        |                                                                             |                                                                             |
|----------|----------|----------|--------|--------|--------|--------|--------|--------|--------|--------|---------|----------|---------|--------|--------|--------|-----------------------------------------------------------------------------|-----------------------------------------------------------------------------|
|          | TF1      | ActivTRN | 72     | 0.8732 | 0.9323 | 0.8587 | 0.9210 | 0.8654 |        |        |         | 75.200   | 57.200  | 475    |        |        |                                                                             | RI = 83.5955006<br>(± 6.9617960) + 20.2365299<br>(± 0.1181858) * DCW(1,20)  |
|          |          | Pass TRN | 56     | 0.8748 | 0.9322 | 0.7574 | 0.9210 | 0.8651 |        |        |         | 70.400   | 56.000  | 370    |        |        |                                                                             |                                                                             |
|          |          | Calib    | 55     | 0.8359 | 0.9122 | 0.9143 | 0.8959 | 0.8217 | 0.8319 | 0.8308 | 0.8391  | 82.500   | 58.200  | 265    | 0.7646 | 0.0521 |                                                                             |                                                                             |
|          |          | Valid    | 90     | 0.8762 | 0.9345 | 0.6256 | 0.9325 | 0.8708 |        |        |         | 70.580   | 56.070  | 623    | 0.8207 | 0.0063 | 0.0111                                                                      |                                                                             |
|          | TF2      | ActivTRN | 72     | 0.9793 | 0.9896 | 0.8594 | 0.9861 | 0.9781 |        |        |         | 30.400   | 20.900  | 3268   |        |        |                                                                             | RI = -38.5051466<br>(± 3.0523364) + 25.3267848<br>(± 0.0525519) * DCW(1,20) |
|          |          | Pass TRN | 56     | 0.9900 | 0.9929 | 0.6578 | 0.9935 | 0.9893 |        |        |         | 23.300   | 19.000  | 5262   |        |        |                                                                             |                                                                             |
|          |          | Calib    | 55     | 0.9279 | 0.9537 | 0.5034 | 0.9748 | 0.9207 | 0.9119 | 0.9113 | 0.9157  | 59.700   | 45.600  | 670    | 0.8937 | 0.0622 |                                                                             |                                                                             |
|          |          | Valid    | 90     | 0.8681 | 0.9173 | 0.8988 | 0.9275 | 0.8608 |        |        |         | 86.028   | 63.519  | 579    | 0.7301 | 0.1386 | 0.0109                                                                      |                                                                             |
|          | TF3      | ActivTRN | 72     | 0.9045 | 0.9498 | 0.9246 | 0.9418 | 0.8988 |        |        |         | 65.300   | 50.600  | 653    |        |        |                                                                             | RI = 40.7742252<br>(± 6.0698364) + 25.9963730<br>(± 0.1254636) * DCW(1,20)  |
|          |          | Pass TRN | 56     | 0.9267 | 0.9596 | 0.8795 | 0.9528 | 0.9207 |        |        |         | 55.400   | 41.700  | 670    |        |        |                                                                             |                                                                             |
|          |          | Calib    | 55     | 0.8919 | 0.9442 | 0.9444 | 0.9310 | 0.8809 | 0.8872 | 0.8865 | 0.8920  | 67.600   | 47.500  | 429    | 0.8427 | 0.0330 |                                                                             |                                                                             |
|          |          | Valid    | 90     | 0.9170 | 0.9545 | 0.6228 | 0.9487 | 0.9129 |        |        |         | 59.466   | 41.459  | 972    | 0.8782 | 0.0486 | 0.0112                                                                      |                                                                             |
| Split 9  | TF0      | ActivTRN | 71     | 0.9787 | 0.9893 | 0.9893 | 0.9848 | 0.9776 |        |        |         | 29.4     | 19.1    | 3132   |        |        |                                                                             | RI = 142.6899048 (± 2.4977201) + 38.2906159 (± 0.0782150) * DCW(1,15)       |
|          |          | Pass TRN | 58     | 0.9893 | 0.9894 | 0.7695 | 0.9924 | 0.9886 |        |        |         | 28.9     | 23.1    | 5090   |        |        |                                                                             |                                                                             |
|          |          | Calib    | 54     | 0.7155 | 0.8419 | 0.4651 | 0.8429 | 0.6896 | 0.6548 | 0.6518 | 0.5995  | 129.8    | 85.9    | 128    | 0.6037 | 0.1372 |                                                                             |                                                                             |
|          |          | Valid    | 90     | 0.6368 | 0.7977 | 0.6916 | 0.7861 | 0.6236 |        |        |         | 117.6759 | 82.6091 |        | 0.5094 | 0.0053 | 0.0144                                                                      |                                                                             |
|          | TF1      | ActivTRN | 71     | 0.8748 | 0.9332 | 0.8833 | 0.9218 | 0.8666 |        |        |         | 71.300   | 53.900  | 475    |        |        |                                                                             | RI = 191.4370563<br>(± 6.5781679) + 21.2721954<br>(± 0.1310442) * DCW(1,15) |
|          |          | Pass TRN | 58     | 0.8277 | 0.8992 | 0.7465 | 0.9049 | 0.8143 |        |        |         | 90.300   | 71.400  | 264    |        |        |                                                                             |                                                                             |
|          |          | Calib    | 54     | 0.8223 | 0.8941 | 0.9068 | 0.8897 | 0.8092 | 0.8198 | 0.8183 | 0.7910  | 93.700   | 74.600  | 236    | 0.6887 | 0.1728 |                                                                             |                                                                             |
|          |          | Valid    | 90     | 0.8593 | 0.9268 | 0.7009 | 0.9298 | 0.8528 |        |        |         | 70.557   | 58.374  | 537    | 0.7971 | 0.0061 | 0.0190                                                                      |                                                                             |
|          | TF2      | ActivTRN | 71     | 0.9705 | 0.9850 | 0.7831 | 0.9809 | 0.9688 |        |        |         | 34.600   | 25.400  | 2238   |        |        |                                                                             | RI = 236.8161537<br>(± 2.8303711) + 23.3274301<br>(± 0.0602518) * DCW(1,15) |
|          |          | Pass TRN | 58     | 0.9779 | 0.9748 | 0.9411 | 0.9839 | 0.9763 |        |        |         | 43.300   | 34.300  | 2434   |        |        |                                                                             |                                                                             |
|          |          | Calib    | 54     | 0.9525 | 0.9754 | 0.9578 | 0.9836 | 0.9478 | 0.9523 | 0.9519 | 0.9447  | 48.200   | 41.000  | 1022   | 0.9297 | 0.0384 |                                                                             |                                                                             |
|          |          | Valid    | 90     | 0.8093 | 0.8954 | 0.7868 | 0.8958 | 0.8016 |        |        |         | 81.296   | 61.324  | 373    | 0.7255 | 0.1457 | 0.0170                                                                      |                                                                             |
| TF3      | ActivTRN | 71       | 0.8853 | 0.9391 | 0.9409 | 0.9344 | 0.8772 |        |        |        | 68.200  | 53.400   | 525     |        |        |        | RI = 225.2594435<br>(± 6.5441537) + 25.5860199<br>(± 0.1587105) * DCW(1,15) |                                                                             |
|          | Pass TRN | 58       | 0.8677 | 0.9157 | 0.6378 | 0.9170 | 0.8583 |        |        |        | 79.800  | 61.100   | 361     |        |        |        |                                                                             |                                                                             |
|          | Calib    | 54       | 0.9315 | 0.9551 | 0.9651 | 0.9604 | 0.9259 | 0.9219 | 0.9213 | 0.9094 | 61.700  | 44.700   | 694     | 0.8047 | 0.0811 |        |                                                                             |                                                                             |
|          | Valid    | 90       | 0.9027 | 0.9457 | 0.8687 | 0.9496 | 0.8982 |        |        |        | 58.4760 | 44.984   | 817     | 0.8281 | 0.0953 | 0.0170 |                                                                             |                                                                             |
| Split 10 | TF0      | ActivTRN | 68     | 0.9821 | 0.9910 | 0.8534 | 0.9882 | 0.9810 |        |        |         | 25.8     | 18.3    | 3573   |        |        |                                                                             | RI = 142.1207626 (± 2.6370522) + 26.4449261 (± 0.0549204) * DCW(1,15)       |
|          |          | Pass TRN | 60     | 0.9920 | 0.9916 | 0.6426 | 0.9944 | 0.9914 |        |        |         | 27.2     | 21.8    | 7089   |        |        |                                                                             |                                                                             |

|                                                                           |          |    |        |        |        |        |        |        |        |        |         |         |      |        |        |        |  |
|---------------------------------------------------------------------------|----------|----|--------|--------|--------|--------|--------|--------|--------|--------|---------|---------|------|--------|--------|--------|--|
|                                                                           | Calib    | 54 | 0.7854 | 0.8808 | 0.7052 | 0.8724 | 0.7604 | 0.7361 | 0.7343 | 0.7530 | 102.1   | 70.3    | 187  | 0.6937 | 0.1474 |        |  |
|                                                                           | Valid    | 91 | 0.8328 | 0.9113 | 0.8638 | 0.8988 | 0.8244 |        |        |        | 83.6267 | 60.3737 |      | 0.7602 | 0.0686 | 0.0087 |  |
| TF1                                                                       | ActivTRN | 68 | 0.9070 | 0.9513 | 0.8708 | 0.9438 | 0.9016 |        |        |        | 58.900  | 46.700  | 634  |        |        |        |  |
|                                                                           | Pass TRN | 60 | 0.8570 | 0.9181 | 0.8631 | 0.9200 | 0.8458 |        |        |        | 83.100  | 65.700  | 341  |        |        |        |  |
|                                                                           | Calib    | 54 | 0.9095 | 0.9527 | 0.9537 | 0.9483 | 0.9016 | 0.9015 | 0.9009 | 0.9078 | 62.400  | 49.000  | 513  | 0.8669 | 0.0843 |        |  |
|                                                                           | Valid    | 91 | 0.8955 | 0.9417 | 0.7160 | 0.9343 | 0.8910 |        |        |        | 65.979  | 51.676  | 763  | 0.8473 | 0.0664 | 0.0082 |  |
| TF2                                                                       | ActivTRN | 68 | 0.9777 | 0.9887 | 0.9597 | 0.9858 | 0.9762 |        |        |        | 28.900  | 20.700  | 2848 |        |        |        |  |
|                                                                           | Pass TRN | 60 | 0.9847 | 0.9905 | 0.7070 | 0.9910 | 0.9835 |        |        |        | 29.100  | 21.000  | 3666 |        |        |        |  |
|                                                                           | Calib    | 54 | 0.9458 | 0.9696 | 0.7111 | 0.9830 | 0.9404 | 0.9346 | 0.9342 | 0.9388 | 50.800  | 42.700  | 890  | 0.8739 | 0.0568 |        |  |
|                                                                           | Valid    | 91 | 0.8406 | 0.9160 | 0.7794 | 0.9067 | 0.8314 |        |        |        | 81.545  | 57.188  | 469  | 0.7708 | 0.0700 | 0.0088 |  |
| TF3                                                                       | ActivTRN | 68 | 0.9021 | 0.9486 | 0.7249 | 0.9458 | 0.8962 |        |        |        | 60.500  | 46.600  | 599  |        |        |        |  |
|                                                                           | Pass TRN | 60 | 0.8191 | 0.9002 | 0.7211 | 0.8978 | 0.8056 |        |        |        | 92.700  | 69.000  | 258  |        |        |        |  |
|                                                                           | Calib    | 54 | 0.9007 | 0.9462 | 0.9491 | 0.9451 | 0.8917 | 0.8847 | 0.8839 | 0.8920 | 67.500  | 53.200  | 463  | 0.8387 | 0.0949 |        |  |
|                                                                           | Valid    | 91 | 0.9006 | 0.9465 | 0.8966 | 0.9380 | 0.8962 |        |        |        | 63.221  | 52.149  | 806  | 0.8547 | 0.0547 | 0.0075 |  |
| $RI = 74.5328435(\pm 6.0237334) + 27.2349441(\pm 0.1280549) * DCW(1,15)$  |          |    |        |        |        |        |        |        |        |        |         |         |      |        |        |        |  |
| $RI = 26.2188488(\pm 3.3430469) + 26.1322476 (\pm 0.0632957) * DCW(1,15)$ |          |    |        |        |        |        |        |        |        |        |         |         |      |        |        |        |  |
| $RI = 110.5639019(\pm 6.0444271) + 21.8635327(\pm 0.1077038) * DCW(1,15)$ |          |    |        |        |        |        |        |        |        |        |         |         |      |        |        |        |  |
